# Supplementary material for: FFNN-LSCE: A two-step neural network model for thereconstruction of surface ocean pCO 2 over the GlobalOcean
Source: Copernicus journal article supplement (doi:10.5194/gmd-2018-247), 2018-11-07
Supplement: Supplementary file 1 [file gmd-2018-247-supplement.pdf]

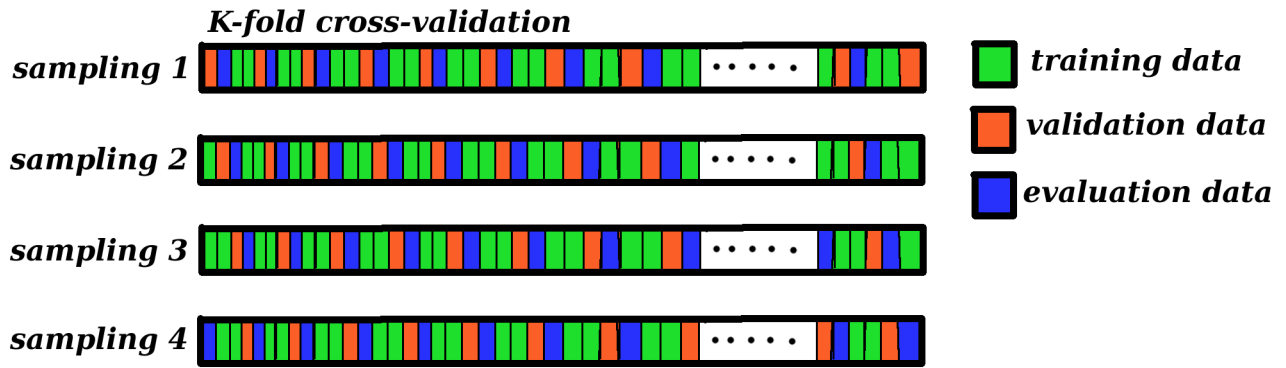

Figure S1: K-fold cross-validation data distribution with 50% of data for training (green), 25% of data for validation (red) and 25% of data for evaluation (blue) for each sampling. Validation and evaluation data are different each time

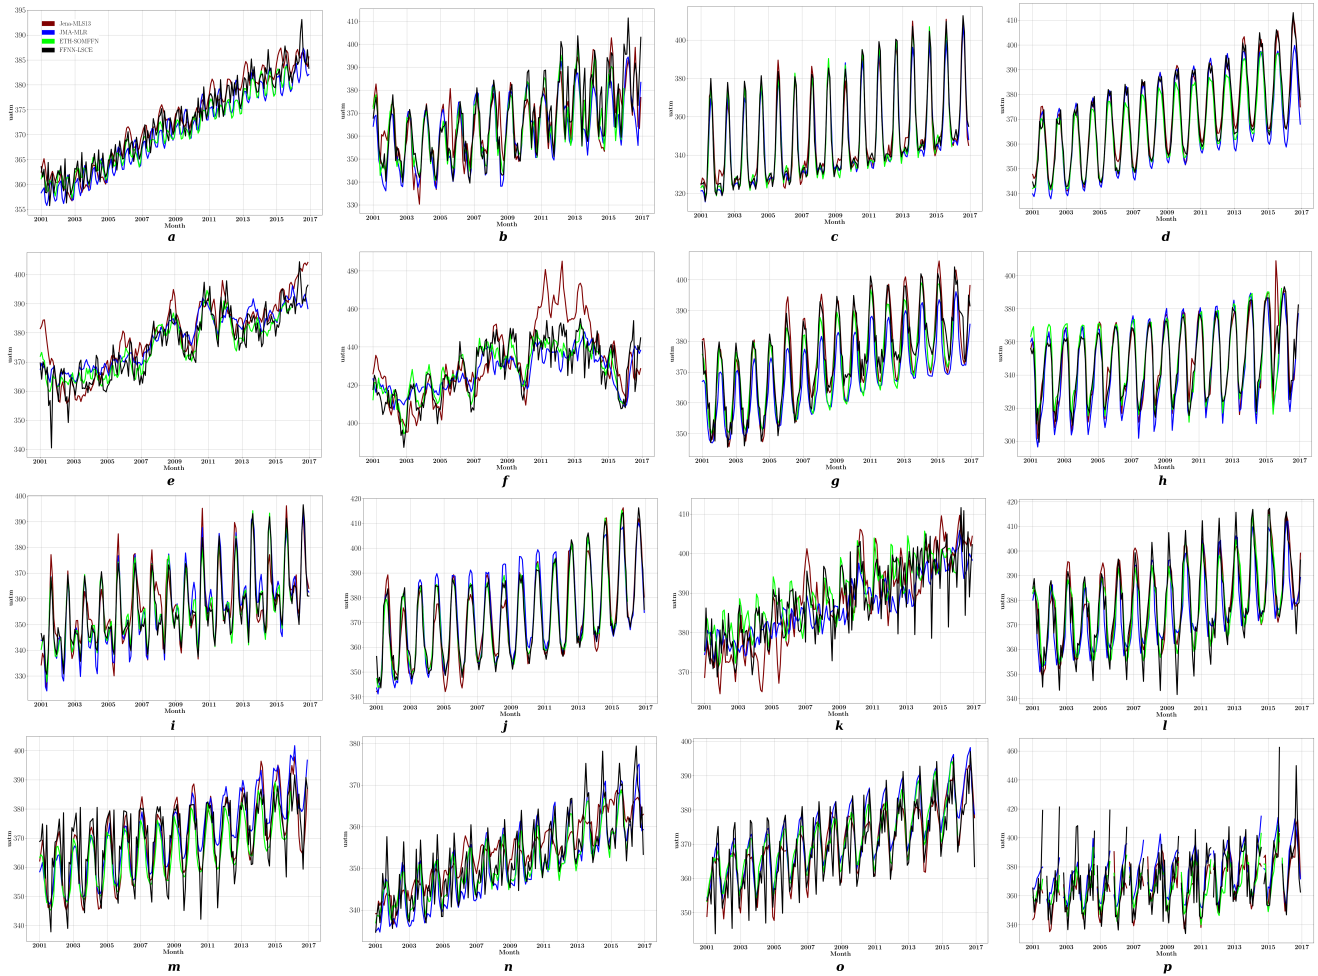

**Figure S2: Monthly time series of pCO<sub>2</sub> of FFNN-LSCE (black), JMA-MLR (blue), Jena-MLS13 (brown), ETH-SOMFFN (green) averaged over: (a) – globe; (b) – biome 2; (c) – biome 3; (d) – biome 4; (e) – biome 5; (f) – biome 6; (g) – biome 7; (h) – biome 9; (i) – biome 10; (j) – biome 11; (k) – biome 12; (l) – biome 13; (m) – biome 14; (n) – biome 15; (o) -biome 16; (p) - biome 17**

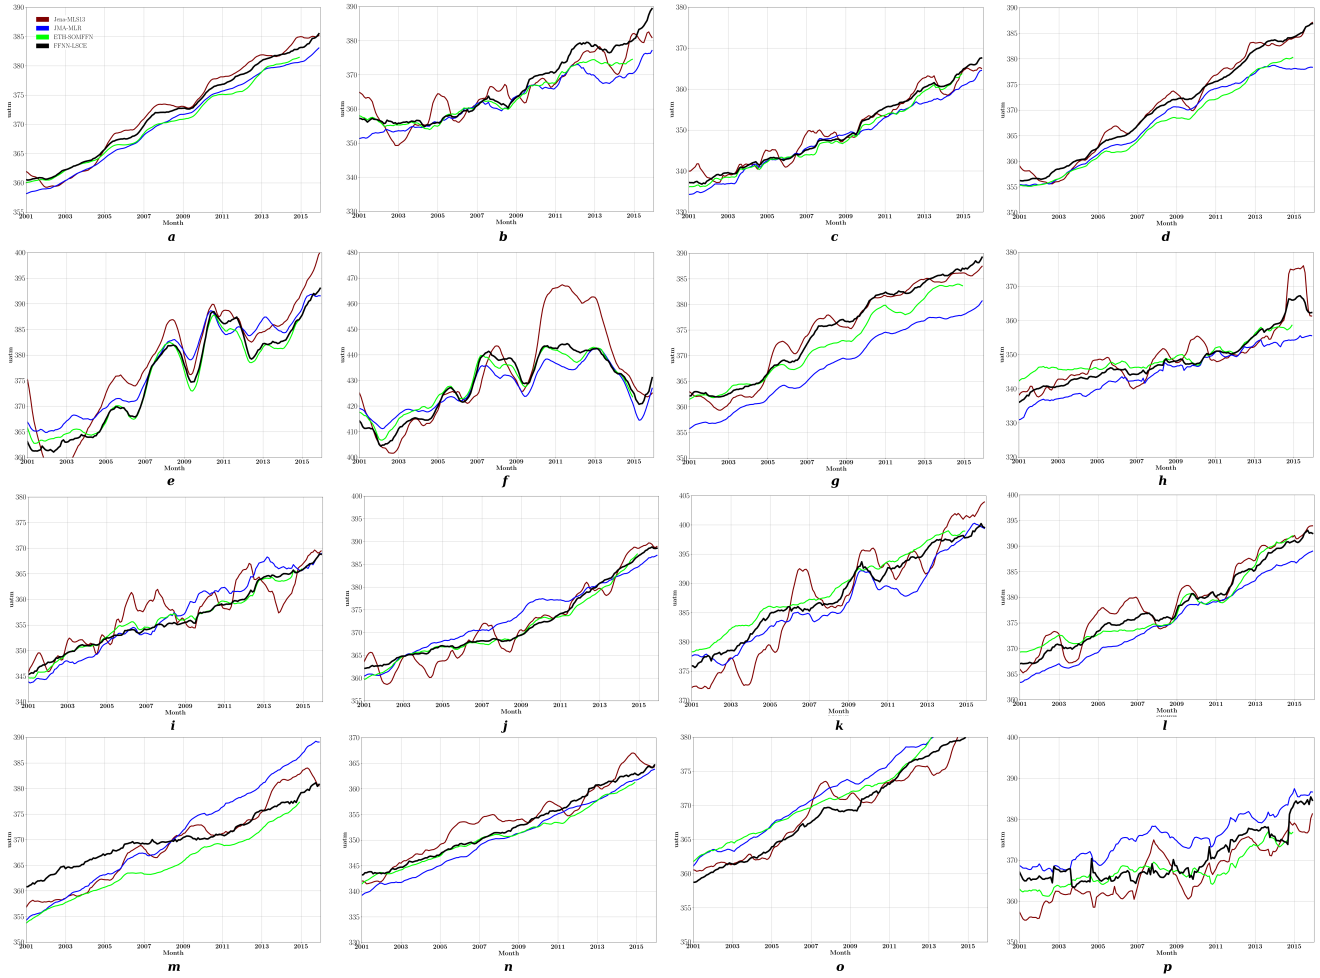

**Figure S3: 12-month running mean of pCO<sub>2</sub> of FFNN-LSCE (black), JMA-MLR (blue), Jena-MLS13 (brown), ETH-SOMFFN (green) averaged over: (a) – globe; (b) – biome 2; (c) – biome 3; (d) – biome 4; (e) – biome 5; (f) – biome 6; (g) – biome 7; (h) – biome 9; (i) – biome 10; (j) – biome 11; (k) – biome 12; (l) – biome 13; (m) – biome 14; (n) – biome 15; (o) – biome 16; (p) – biome 17**

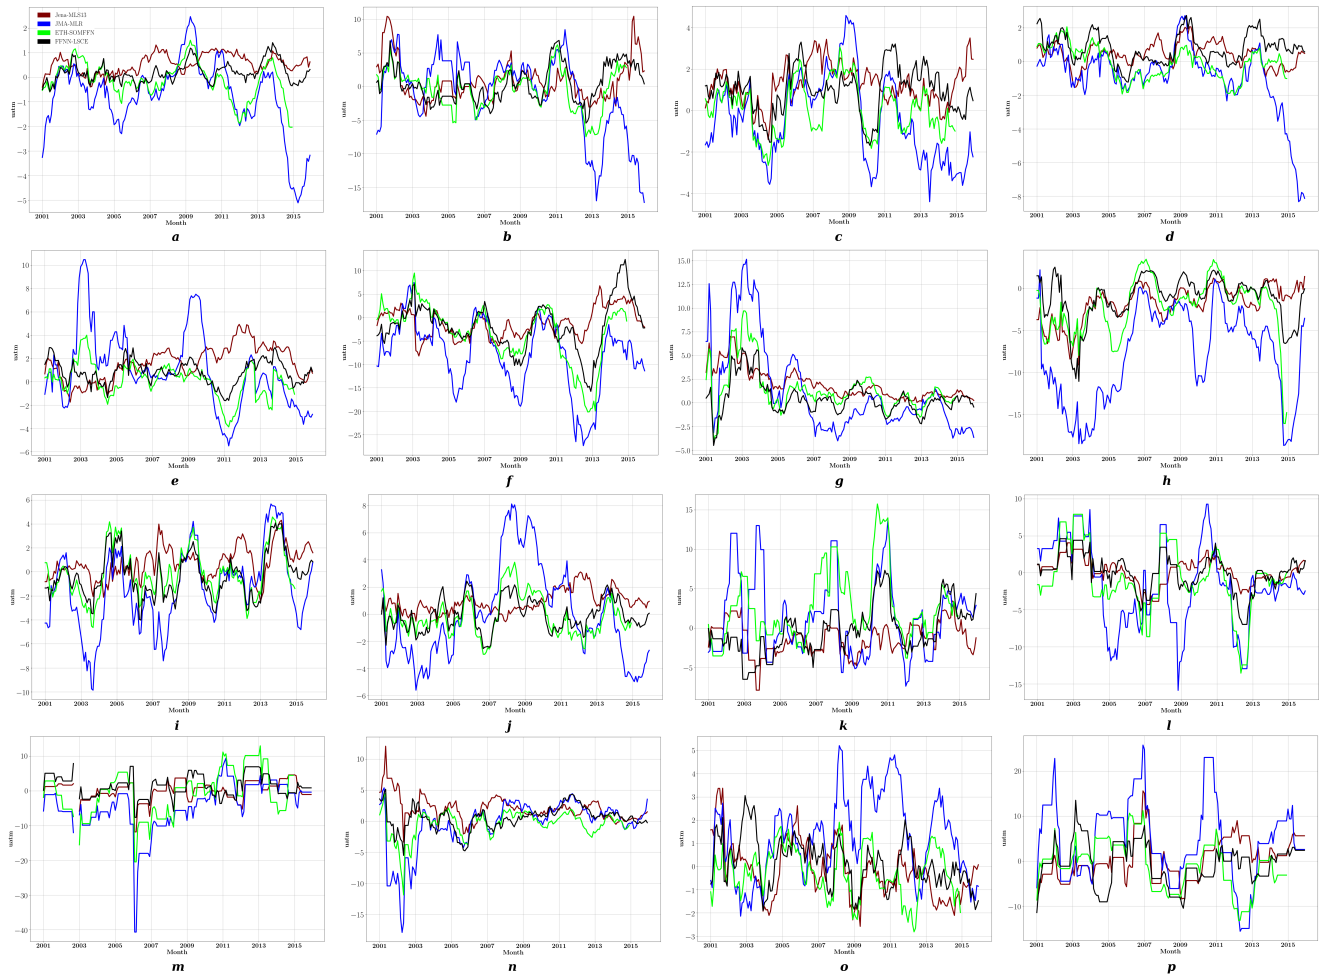

**Figure S4: Yearly  $p\text{CO}_2$  mismatch (difference of mapping methods and SOCAT data) of FFNN-LSCe (black), JMA-MLR (blue), Jena-MLS13 (brown), ETH-SOMFFN (green) averaged over: (a) – globe; (b) – biome 2; (c) – biome 3; (d) – biome 4; (e) – biome 5; (f) – biome 6; (g) – biome 7; (h) – biome 9; (i) – biome 10; (j) – biome 11; (k) – biome 12; (l) – biome 13; (m) – biome 14; (n) – biome 15; (o) – biome 16; (p) – biome - 17**



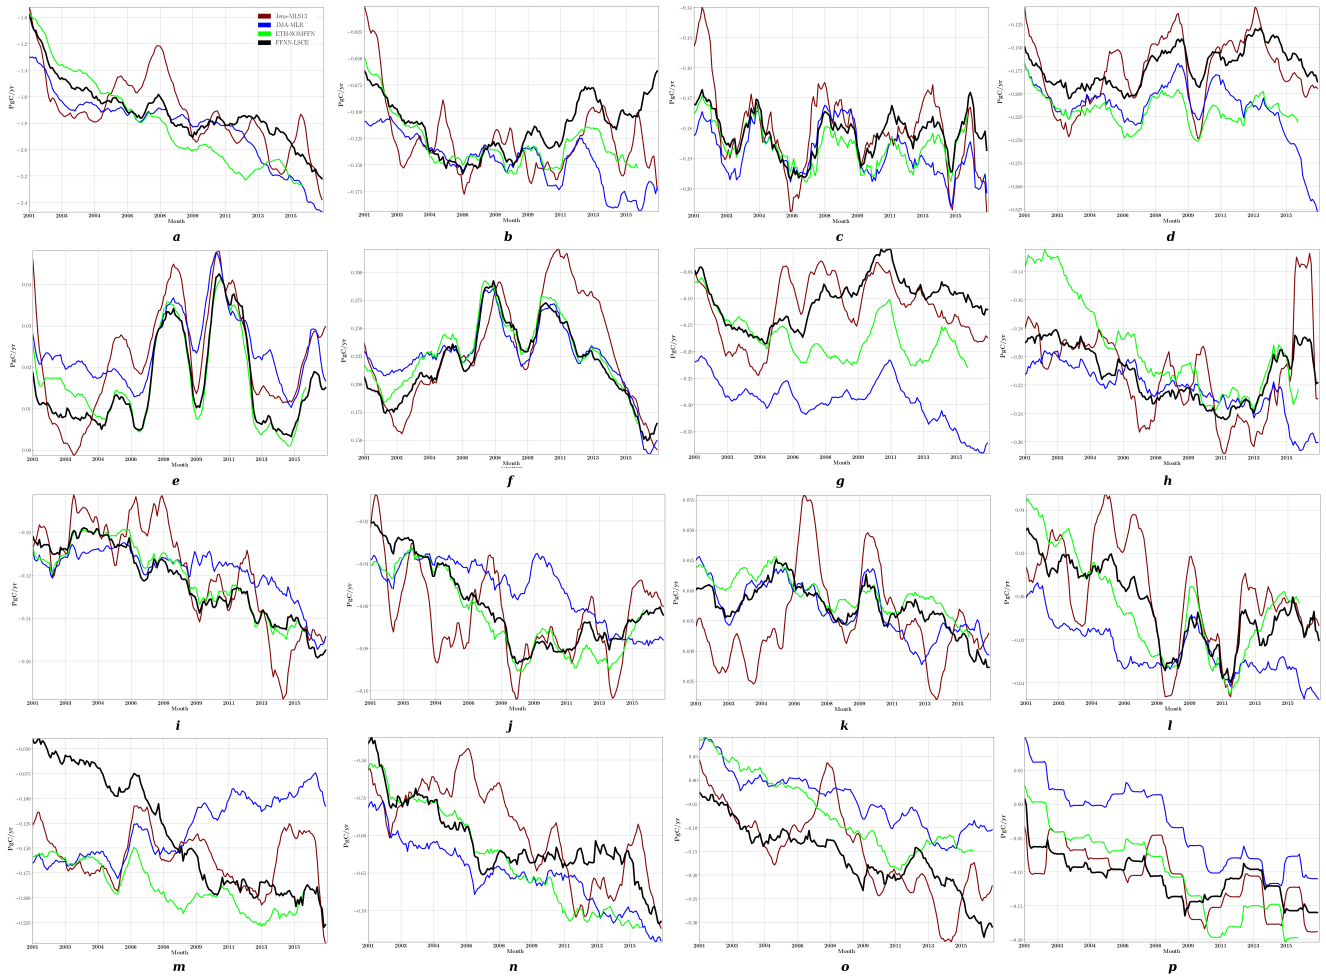

**Figure S5: Interannual sea-air CO<sub>2</sub> flux (12-month running mean) from FFNN-LSCE (black), JMA-MLR (blue), Jena-MLS13 (brown), ETH-SOMFFN (green) averaged over: (a) – globe; (b) – biome 2; (c) – biome 3; (d) – biome 4; (e) – biome 5; (f) – biome 6; (g) – biome 7; (h) – biome 9; (i) – biome 10; (j) – biome 11; (k) – biome 12; (l) – biome 13; (m) – biome 14; (n) – biome 15; (o) – biome 16; (p) – biome - 17**

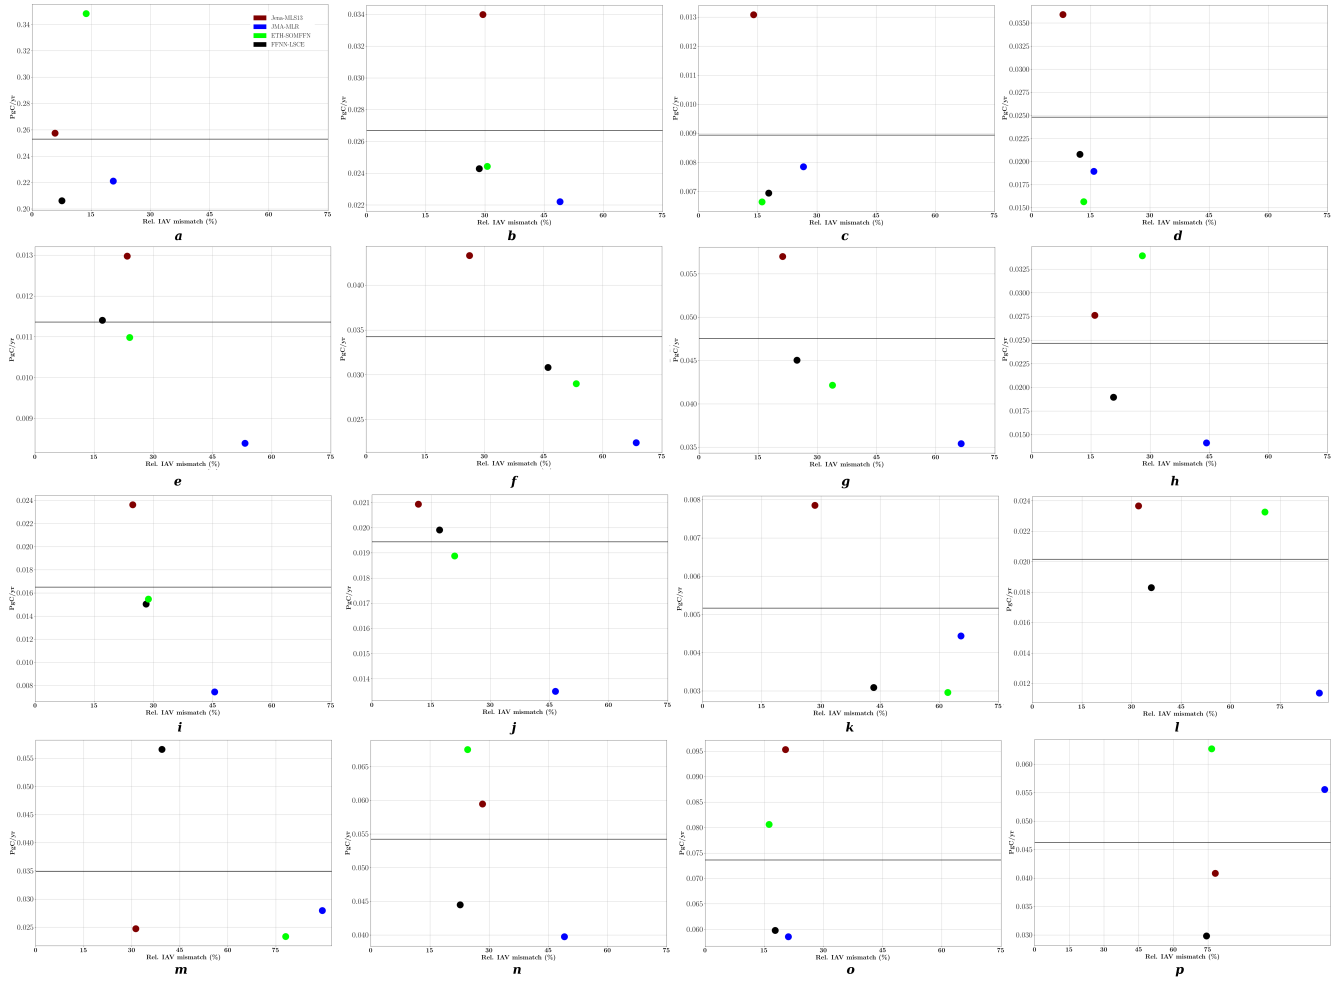

**Figure S6: Amplitude of interannual CO<sub>2</sub> flux plotted against the relative IAV mismatch amplitude for FFNN-LSCE (black), JMA-MLR (blue), Jena-MLS13 (brown), ETH-SOMFFN (green) averaged over: (a) – globe; (b) – biome 2; (c) – biome 3; (d) – biome 4; (e) – biome 5; (f) – biome 6; (g) – biome 7; (h) – biome 9; (i) – biome 10; (j) – biome 11; (k) – biome 12; (l) – biome 13; (m) – biome 14; (n) – biome 15; (o) – biome 16; (p) – biome – 17. The weighted mean is given as a horizontal line**

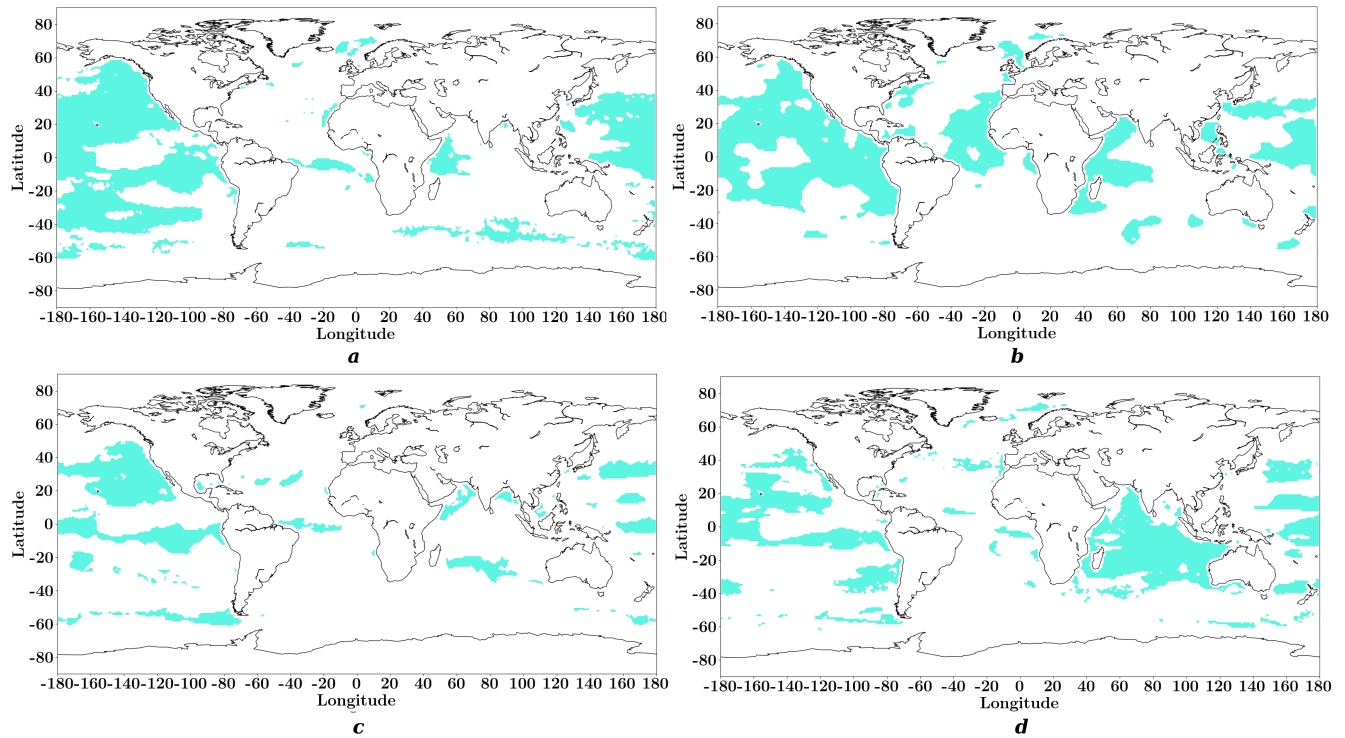

**Figure S7: According between sea-air CO<sub>2</sub> flux and atmospheric pCO<sub>2</sub> trends. Blue color indicates the regions where two characteristics have the same sign of linear trend. Atmospheric pCO<sub>2</sub> from Jena inversion and: (a) - FFNN-LSCE; (b) - Jena-NLS13; (c) - ETH-SOMFFN; (d) - JMA-MLR**

**Table S1: Mean of sea-air CO<sub>2</sub> flux (PgC/yr) over the Global Ocean and per biomes (Rödenbeck et al., 2015) for common period 2001-2015.**

| Biome | FFNN-LSCE | ETH-SOMFFN | Jena-MLS13 | JMA-MLR |
|-------|-----------|------------|------------|---------|
| Globe | -1.55     | -1.67      | -1.55      | -1.74   |
| 2     | -0.11     | -0.12      | -0.12      | -0.14   |
| 3     | -0.18     | -0.18      | -0.18      | -0.18   |
| 4     | -0.17     | -0.21      | -0.17      | -0.21   |
| 5     | 0.016     | 0.017      | 0.023      | 0.024   |
| 6     | 0.22      | 0.22       | 0.23       | 0.23    |
| 7     | -0.1      | -0.17      | -0.11      | -0.28   |
| 9     | -0.18     | -0.16      | -0.17      | -0.18   |
| 10    | -0.12     | -0.12      | -0.11      | -0.11   |
| 11    | -0.06     | -0.06      | -0.06      | -0.05   |
| 12    | 0.03      | 0.04       | 0.03       | 0.03    |
| 13    | -0.004    | -0.004     | 0.0016     | -0.024  |
| 14    | -0.13     | -0.18      | -0.15      | -0.13   |
| 15    | -0.6      | -0.63      | -0.58      | -0.65   |
| 16    | -0.14     | -0.05      | -0.13      | -0.04   |
| 17    | -0.025    | -0.024     | -0.029     | -0.0006 |
