# Supplementary material for: FFNN-LSCE: A two-step neural network model for thereconstruction of surface ocean pCO 2 over the GlobalOcean
Source: Copernicus journal article supplement (doi:10.5194/gmd-2018-247), 2018-11-07
Supplement: Supplementary file [file gmd-2018-247-RC2-supplement.pdf]

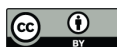

# 1FFNN-LSCE: A two-step neural network model for the 2reconstruction of surface ocean pCO<sub>2</sub> over the Global 3Ocean.

4

5Anna Denvil-Sommer<sup>1</sup>, Marion Gehlen<sup>1</sup>, Mathieu Vrac<sup>1</sup>, Carlos Mejia<sup>2</sup>

6<sup>1</sup>Laboratoire des Sciences du Climat et de l'Environnement (LSCE), Institut Pierre Simon Laplace (IPSL),

7CNRS/CEA/UVSQ/Univ. Paris-Saclay, Orme des Merisiers, Gif-Sur-Yvette, 91191, France

8<sup>2</sup>Sorbonne Université, CNRS, IRD, MNHN, Institut Pierre Simon Laplace (IPSL), Paris, 75005, France

9

10Correspondence to: Anna Denvil-Sommer ([anna.sommer.lab@gmail.com](mailto:anna.sommer.lab@gmail.com))

11

## 12Abstract.

13A new Feed-Forward Neural Network (FFNN) model is presented to reconstruct surface ocean partial  
14pressure of carbon dioxide (pCO<sub>2</sub>) over the global ocean. The model consists of two steps: (1)  
15reconstruction of pCO<sub>2</sub> climatology and (2) reconstruction of pCO<sub>2</sub> anomalies with respect to the  
16climatology. For the first step, a gridded climatology was used as the target, along with sea surface salinity  
17and temperature (SSS and SST), sea surface height (SSH), chlorophyll *a* (Chl), mixed layer depth (MLD),  
18as well as latitude and longitude as predictors. For the second step, data from the Surface Ocean CO<sub>2</sub> Atlas  
19(SOCAT) provided the target. The same set of predictors was used during step 2 augmented by their  
20anomalies. During each step, the FFNN model reconstructs the non-linear relations between pCO<sub>2</sub> and the  
21ocean predictors. It provides monthly surface ocean pCO<sub>2</sub> distributions on a 1°x1° grid for the period 2001-  
222016. Global ocean pCO<sub>2</sub> was reconstructed with a satisfying accuracy compared to independent  
23observational data from SOCAT. However, errors are larger in regions with poor data coverage (e.g. Indian  
24Ocean, Southern Ocean, subpolar Pacific). The model captured the strong interannual variability of surface  
25ocean pCO<sub>2</sub> with reasonable skills over the Equatorial Pacific associated with ENSO (El Niño Southern  
26Oscillation). Our model was compared to three pCO<sub>2</sub> mapping methods that participated in the Surface  
27Ocean pCO<sub>2</sub> Mapping intercomparison (SOCOM) initiative. We found a good agreement in seasonal and  
28interannual variability between the models over the global ocean. However, important differences still exist  
29at the regional scale, especially in the Southern hemisphere and in particular, the Southern Pacific and the  
30Indian Ocean, as these regions suffer from poor data-coverage. Large regional uncertainties in  
31reconstructed surface ocean pCO<sub>2</sub> and sea-air CO<sub>2</sub> fluxes have a strong influence on global estimates of  
32CO<sub>2</sub> fluxes and trends.

33

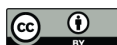

### 341. Introduction.

35

36The global ocean is a major sink of excess CO<sub>2</sub> emitted to the atmosphere since the beginning of the  
37industrial revolution. In 2011, the best estimate of the ocean inventory of anthropogenic carbon (C<sub>ant</sub>)  
38amounted to 155 ± 30 PgC or 28% of cumulated total CO<sub>2</sub> emissions attributed the human activities since  
391750 (Ciais et al., 2013). Between 2000 and 2009, the yearly average ocean C<sub>ant</sub> uptake was 2.3 ± 0.7 PgC  
40yr<sup>-1</sup> (Ciais et al., 2013). ~~These global estimates hide, however,~~ substantial regional and inter-annual  
41fluctuations (Rödenbeck et al., 2015), which need to be quantified in order to track the evolution of the  
42Earth's carbon budget (e.g. Le Quéré et al., 2018).

43

44 Until recently, most estimates of inter-annual air-sea CO<sub>2</sub> flux variability were based on atmospheric  
45inversions (Peylin et al., 2005, 2013; Rödenbeck et al., 2005) or global ocean circulation models (Orr et al.,  
462001; Aumont and Bopp, 2006; Le Quéré et al., 2010). However, models tend to underestimate the  
47variability of air-sea CO<sub>2</sub> fluxes (Le Quéré et al., 2003), while atmospheric inversions suffer from a still  
48sparse network of atmospheric CO<sub>2</sub> measurements (Peylin et al., 2013). These approaches are increasingly  
49complemented by data-based techniques relying on *in situ* measurements of CO<sub>2</sub> fugacity (e.g.  
50Landschützer et al., 2016; Rödenbeck et al., 2014, 2015; Takahashi et al., 2002, 2009, Landschützer et al.,  
512013; Schuster et al., 2013; Nakaoka et al., 2013; Fay et al., 2014). These techniques rely on a variety of  
52data-interpolation approaches developed to provide estimates in time and space of surface ocean pCO<sub>2</sub>  
53(Rödenbeck et al., 2015) such as statistical interpolation, linear and non-linear regressions, or model-based  
54regressions or tuning (Rödenbeck et al., 2014, 2015). These methods have their advantages, ~~as well as~~  
55disadvantages ~~and~~ are compared and discussed in Rödenbeck et al. (2015). This intercomparison did not  
56allow identifying a single optimal technique, but rather pleaded in favour of exploiting the ensemble of  
57methods.

58

59Artificial neural networks (ANN) have been widely used to reconstruct surface ocean pCO<sub>2</sub> (open ocean:  
60Lefèvre et al., 2005; Friedrich and Oschlies, 2009b; Telszewski et al., 2009; Landschützer et al., 2013;  
61Nakaoka et al., 2013; Zeng et al. 2014; coastal region: Laruelle et al., 2017). ANN fill the spatial and  
62temporal gaps based on calibrated non-linear statistical relationships between pCO<sub>2</sub> and its oceanic and  
63atmospheric drivers. The existing products usually present monthly fields with a 1°x1° spatial resolution  
64and capture a large part of temporal-spatial variability. **Methods based on ANN are able to represent the**  
65**large class of pCO<sub>2</sub>-driver relationships, but they are sensitive to the number of data used in the training**  
66**algorithm and can generate artificial variability in regions with sparse data coverage.**

67

68This study proposes an alternative implementation of a neural network applied to the reconstruction of  
69surface ocean pCO<sub>2</sub> over the period 2001-2016. It belongs to the category of **Forward Feed Neural**



72 Networks (FFNN) and consists of a two-step approach: (1) the reconstruction of monthly climatologies of  
73 global surface ocean  $p\text{CO}_2$  based on data from Takahashi et al. (2009), and (2) the reconstruction of  
74 monthly anomalies (with respect to the monthly climatologies) on a  $1^\circ \times 1^\circ$  grid exploiting the Surface  
75 Ocean  $\text{CO}_2$  Atlas (SOCAT) (Bakker et al., 2016). The model is easily applied to the global ocean without  
76 any boundaries between the ocean basins or regions. However, as mentioned before, it is still sensitive to  
77 the observational coverage. This limitation is partly overcome by the two-step approach as the  
78 reconstruction of monthly climatologies draws on a larger data set, thereby keeping FFNN output close to  
79 realistic values. Furthermore, the reconstruction of monthly climatologies during the first step allows taking  
80 into account a potential change in seasonal cycle in response to climate change when applied to time slices  
81 or to model output providing the drivers, but no carbon cycle variables.

82 The remainder of this paper is structured as follows: section 2 introduces data sets used during this study  
83 and describes the neural network; section 3 presents results for its validation and qualification, as well as a  
84 comparison to three mapping methods part of the Surface Ocean  $p\text{CO}_2$  Mapping intercomparison  
85 (SOCOM) exercise (Rödenbeck et al., 2015). Results and perspectives are summarized in the last section.

86

## 87 2. Data and method.

88

### 89 2.1. Data.

90 The standard set of variables known to represent physical, chemical and biological drivers of surface ocean  
91  $p\text{CO}_2$  – mean state and variability – (Takahashi et al., 2009; Landschützer et al., 2013) were used as input  
92 variables (or predictors) for training the FFNN algorithm. These are sea surface salinity (SSS), sea surface  
93 temperature (SST), mixed layer depth (MLD), chlorophyll *a* concentration (CHL), atmospheric  $\text{CO}_2$  mole  
94 fraction ( $x\text{CO}_{2,\text{atm}}$ ). Based on Rodgers et al. (2009) who reported a strong correlation between natural  
95 variations in dissolved inorganic carbon (DIC) and sea surface height (SSH), SSH was added as a new  
96 driver to this list.

97 For the first step, the reconstruction of monthly climatologies, the Takahashi et al. (2009) monthly  $p\text{CO}_2$   
98 gridded climatology ( $1^\circ \times 1^\circ$ ) was used as the target. The original climatology was constructed by an  
99 advection-based interpolation method on a  $4^\circ \times 5^\circ$  grid. It was interpolated on the  $1^\circ \times 1^\circ$  SOCAT grid which  
100 is also the final output for the FFNN.

101 For the second step, the observational data-base SOCAT v5 (Bakker et al., 2016) provided the target. We  
102 used a gridded version of this dataset that was derived by combining all SOCAT data collected within a  
103  $1^\circ \times 1^\circ$  box during a specific month. SOCAT v5 represents global observations of sea surface fugacity of  $\text{CO}_2$   
104 ( $f\text{CO}_2$ ) over the period 1970 to 2016. It includes data from moorings, ships and drifters. These data are  
105 distributed irregularly over the global ocean with 188274 gridded measurements over the Northern  
106 hemisphere and 76065 over the Southern hemisphere. In order to ensure a satisfying spatial and temporal  
107 data coverage, we limited the reconstruction to the period 2001–2016, which represents ~77% of the data

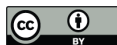

base (Fig. 1(a)).

The following formula is used to convert  $f\text{CO}_2$  to  $p\text{CO}_2$  (Körtzinger et al., 1999):

$$f\text{CO}_2 = p\text{CO}_2 \exp\left(p \frac{B + 2\delta}{RT}\right), \quad (1)$$

where  $f\text{CO}_2$  and  $p\text{CO}_2$  are in  $\mu\text{atm}$ ,  $p$  is the total pressure (Pa),  $R=8.314 \text{ JK}^{-1}$  is the gas constant,  $T$  is the absolute temperature (K). Parameter  $B$  ( $\text{m}^3\text{mol}^{-1}$ ) is estimated as:  $B = (-1636.75 + 12.0408 T - 3.27957 \cdot 10^{-2} T^2 + 3.16528 \cdot 10^{-5} T^3) \cdot 10^{-6}$ . The parameter  $\delta$  is the cross virial coefficient ( $\text{m}^3\text{mol}^{-1}$ ):  $\delta = (57.7 - 118T) \cdot 10^{-6}$ . The total pressure is from the Jena data-base (6h,  $5^\circ \times 5^\circ$ ) (<http://www.bgc-jena.mpg.de/CarboScope/?ID=s>).

Monthly global observed physics reprocessed products distributed through the Copernicus Marine

Environment Monitoring Service (CMEMS) ( $0.25^\circ \times 0.25^\circ$ ) ([http://marine.copernicus.eu/services-portfolio/access-to-products/?option=com\\_csw&view=details&product\\_id=MULTIOBS\\_GLO\\_PHY\\_REP\\_015\\_002](http://marine.copernicus.eu/services-portfolio/access-to-products/?option=com_csw&view=details&product_id=MULTIOBS_GLO_PHY_REP_015_002)) were used for SSS,

SST and SSH. The GlobColour project provided monthly CHL distributions at  $1^\circ \times 1^\circ$  resolution ([http://www.globcolour.info/products\\_description.html](http://www.globcolour.info/products_description.html)). For MLD, daily data from the “Estimating the Circulation and Climate of the Ocean” (ECCO2) project Phase II, at  $0.25^\circ \times 0.25^\circ$  resolution (Menemenlis et al., 2008) were used. For  $x\text{CO}_2$  atmospheric, the 6h data from Jena  $\text{CO}_2$  inversion s76\_v4.1 on a  $5^\circ \times 5^\circ$  grid were selected (<http://www.bgc-jena.mpg.de/CarboScope/?ID=s>). Finally, an ice mask based on daily “Operational Sea Surface Temperature and Sea Ice Analysis” (OSTIA) with a gridded  $0.05^\circ \times 0.05^\circ$  resolution (Donlon et al., 2011) was applied.

MLD and CHL were log-transformed before their use in the FFNN algorithm because of their skewed distribution. In regions with no CHL data (high latitudes in winter)  $\log(\text{CHL}) = 0$  was applied. It does not introduce discontinuities since  $\log(\text{CHL})$  is close to zero in the adjacent region.

All data were averaged or interpolated on a  $1^\circ \times 1^\circ$  grid and, depending on the resolution of the data set,

averaged over the month. It is worth noting that all data sets have to be normalized (i.e. centered to zero-mean and reduced to unit standard deviation) before their use in the FFNN algorithm, for example:

$$\text{SSS}_n = \frac{\text{SSS} - \bar{\text{SSS}}}{\text{std}(\text{SSS})}.$$

Normalization ensures that all predictors fall within a comparable range and therefore avoids giving more weight to predictors with large variability ranges (Kallache et al., 2011).

As surface ocean  $p\text{CO}_2$  also varies spatially, geographical positions (lat, lon) were included as predictors. In order to normalize (lat, lon) the following transformation is proposed:

$$\text{lat}_n = \sin(\text{lat})$$

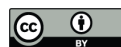

$$lon_n1 = \sin(lon)$$

$$lon_n2 = \cos(lon)$$

Two functions *sin* and *cos* for longitudes are used to preserve its periodical 0 to 360 degrees behavior and thus to consider the difference of positions before and after the 0° longitude. For step 2, data required for training were co-located at the SOCAT data positions that are used as target for the FFNN model. Details are provided in the next section.

147

1482.2. Method.

149

150a) Network configuration and evaluation protocol

151

In this work we use Keras, a high-level neural network Python library (“Keras: The Python Deep Learning library”, Chollet, 2015; <https://keras.io>) to build and train the FFNN models. The identification of an optimal configuration is the first step in the FFNN model building. This includes: the choice of number and size of hidden layers (i.e., intermediate layers between input and output layers), connection type, activation functions, loss function and optimization algorithm, as well as the learning rate and other low-level parameters. Based on a series of tests and their statistical results (RMS, correlation, bias) a hyperbolic tangent was chosen as an activation function for neurons in hidden layers, and a linear function for the output layer. As optimization algorithm the mini-batch gradient descent or RMSprop was used (adaptive learning rates for each weight, Chollet, 2015; Hinton et al., 2012). The number of layers and neurons depends on the problem. For totally connected layers (i.e., a neuron in a hidden layer is connected to all neurons in the precedent layer and connects all neurons in the next one), the case here, it is enough to have only one single hidden layer but two or more can help the approximation of complex functions (or complex relations between the input and the output of the problem).

165

The number of the FFNN layers and number of neurons depends on one side on the complexity of the problem: the more layers and neurons, the better the accuracy of output. However, the size also depends on the number of patterns (data) used for training. There is a well-known empirical rule advising to have a factor of 10 between number of patterns (data) and number of connections, or weights to adjust. This limits the size, the number of parameters and incidentally the number of neurons, of the FFNN. This empirical rule was followed in this study.

172

173(1) Step 1: reconstruction of monthly climatologies

FFNN reconstructs a monthly surface ocean pCO<sub>2</sub> climatology as a nonlinear function of SSS, SST, SSH, Chl, MLD and geographical position (longitude, latitude):

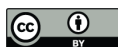

$$pCO_{2,n} = (SSS_n, SST_n, SSH_n, Chl_n, MLD_n, lon_n, lat_n) \quad (2)$$

Surface ocean  $pCO_2$  from Takahashi et al. (2009) provided the target. The data set was divided into 50% for FFNN training and 25% for its evaluation. This 25% did not participate in the training. This set is used to monitor process performance and drive convergence. The remaining 25% (each 4<sup>th</sup> point) of the data set were used after training for the FFNN model validation. More details about the FFNN training process can be found in Rumelhart et al. (1986) and Bishop (1995). Validation and evaluation data sets were chosen quasi-regularly in space and time to take into account all regions and seasonal variability. In order to improve the accuracy of the reconstruction, the model was applied separately for each month. Tests with one model for 12 months showed a slight decrease in accuracy (not presented here). We have developed a FFNN model with 5 layers (3 hidden layers). About 17500 data were available for each month to train the model, resulting in monthly FFNN models with about 1856 parameters.

187

(2) Step 2: reconstruction of anomalies

During the second step,  $pCO_2$  anomalies were reconstructed as a nonlinear function of SSS, SST, SSH, Chl, MLD,  $xCO_2$  and their anomalies, as well as geographic position:

$$pCO_{2,n,anom} = (SSS_n, SST_n, SSH_n, Chl_n, MLD_n, xCO_{2,n}, SSS_{anom,n}, SST_{anom,n}, SSH_{anom,n}, Chl_{anom,n}, MLD_{anom,n}, xCO_{2,anom,n}, lon_n, lat_n) \quad (3)$$

Surface ocean  $pCO_2$  anomalies computed as the differences between collocated  $pCO_2$  values based on SOCAT observations and monthly  $pCO_2$  climatologies reconstructed during the first step provided the targets:

$$pCO_{2,anom} = pCO_{2,SOCAT} - pCO_{2,clim,FFNN} \quad (4)$$

The set of target data was again divided into 50% for the training algorithm, 25% for evaluation and 25% for model validation. As in step (1) the model was trained separately for each month. There were thus 12 models sharing a common architecture but trained on different data. At this step, in order to increase the amount of data during training and to introduce information on the seasonal cycle, the model was trained using as a target  $pCO_2$  data from the month in question as well as those from the previous and following month during the entire period 2001–2016. Figures 1 (b) and 1 (c) show an example of data distribution for the sole months of January over the period 2001–2016 (Fig. 1 (b)) and for the three months time-window December–January–February 2001–2016 used in the training algorithm of the January FFNN model (Fig. 1 (c)). In this particular example, the choice of three months provided a better cover of the region and doubled the number of data at high latitudes.

206

7K-fold cross-validation was used for evaluation and validation of the FFNN architecture. Cross-validation relied on K=4 different subsampling of the data set to draw 25% of independent data for validation (Fig. 209S1). Each sampling was tested on 5 runs of the FFNN for each month. Each of these 5 runs is characterized



209by different initial values that are chosen automatically. From these 5 results, the best was chosen based on  
210root-mean-square-error (RMSE),  $r^2$  and bias.

211  
212The final model architecture had 3 layers (1 hidden layer). About 10000 samples were available for training  
213for each month, thus, a model with 541 parameters was developed. Note that a higher number of  
214parameters did not show a significant improvement of accuracy (not shown).

215  
216b) Reconstruction of surface ocean  $pCO_2$   
217The previous section presented the development of a FFNN model for the reconstruction of global surface  
218ocean  $pCO_2$ , and the estimation of its accuracy. It allowed to identify the “optimal” FFNN architecture for  
219the reconstruction of surface  $pCO_2$  and its validation. This FFNN model was used to provide the final  
220product for scientific analysis and comparison with other mapping approaches. In order to provide the final  
221output, the selected FFNN architecture is trained on all available data: 100% of data for training, 100% for  
222evaluation and 100% for validation. The network was executed 5 times (different initial values) and the best  
223model was selected based on validation results considering root-mean-square-error (RMSE), correlation  
224and bias computed between network output and SOCAT derived surface ocean  $pCO_2$  data. The final model  
225output is referred to as the FFNN-LSCE product.

226  
2272.3. Computation of sea-air  $CO_2$  fluxes.

228Sea-air  $CO_2$  flux  $f$  was calculated following Rödenbeck et al. (2015) as:

$$229 \quad f = k p L \left( pCO_2 - pCO_2^{atm} \right) \quad (5)$$

230

231where  $k$  is the piston velocity estimated according to Wanninkhof (1992):

$$232 \quad k = \Gamma u^2 \left( Sc^{CO_2} / Sc^{Ref} \right)^{-0.5} \quad (6)$$

233The global scaling factor  $\Gamma$  was chosen as in Rödenbeck et al. (2014) with the global mean  $CO_2$  piston  
234velocity equaling to 16.5 cm/h.  $Sc$  corresponds to the Schmidt number estimated according to Wanninkhof  
235(1992). The wind speed was computed from 6-hourly NCEP wind speed (Kalnay et al., 1996).  $\rho$  stands  
236for seawater density in (4) and  $L$  for temperature-dependent solubility (Weiss, 1974).  $pCO_2$  corresponds to  
237the surface ocean  $pCO_2$  output of the mapping method.  $pCO_2^{atm}$  was derived from the atmospheric  $CO_2$   
238mixing ratio fields provided by the Jena inversion (<http://www.bgc-jena.mpg.de/CarboScope/>).

239

### 2403. Results.

241

#### 2423.1. Validation.

243The subset of data used for network validation, that is 25% of the total, represents independent observations



as they did not participate in training. The skill of the FFNN to reconstruct monthly climatologies of surface ocean  $p\text{CO}_2$ , was assessed by comparing collocated reconstructed  $p\text{CO}_2$  and corresponding values from Takahashi et al. (2009). The global climatology was reconstructed with a satisfying accuracy during step 1 with a RMSE of  $0.17 \mu\text{atm}$  and  $r^2$  of 0.93. Model output of step 2 was assessed by K-fold cross validation as presented before: K=4 different subsamplings of independent data were drawn from the data set and the network was run 5 times on each subsampling. From these 20 results the best one was chosen based on RMSE,  $r^2$  and bias. The combination of the four best model output was used for the statistical analysis summarized in Table 1. Metrics were computed over the full period (2001-2016) and with reference to SOCAT observations (independent data only). At the global scale, the analysis yielded a RMSE of  $\sim 17.97 \mu\text{atm}$ , while the absolute bias was  $11.52 \mu\text{atm}$  and  $r^2$  0.76. These results are comparable to those obtained by Landschützer et al. (2013) for the assessment of a surface ocean  $p\text{CO}_2$  reconstruction based on an alternative neural network-based approach. The RMSE between SOCAT data and the climatology of  $p\text{CO}_2$  from Takahashi et al. (2009) equals  $41.87 \mu\text{atm}$ , larger than errors computed for the regional comparison between FFNN and SOCAT (Table 1).

258

Figure 2 (a) shows the time mean difference between the estimated  $p\text{CO}_2$  and  $p\text{CO}_2$  from SOCAT v5 data used for validation  $\text{mean}_t(p\text{CO}_{2,i,j,\text{FFNN}} - p\text{CO}_{2,i,j,\text{SOCAT}})$ . Large differences occurred at high latitudes, in equatorial regions, along the Gulf Stream and Kuroshio currents – the regions with strong horizontal gradient of  $p\text{CO}_2$ . Moreover the standard deviation of residuals (Figure 2 (b)) in these regions was larger indicating that the model fails to accurately reproduce the temporal variability. The reduced skill of the model in these regions reflects the poor data coverage along with a strong seasonal variability (e.g. Southern Ocean) and/or high kinetic energy (e.g. Southern Ocean, Kuroshio and Gulf Stream currents) (Fig. 1 (a)). At the scale of ocean regions, (Table 1) the largest RMSE and bias were computed for the Pacific Subpolar ocean (RMSE =  $34.77 \mu\text{atm}$ , bias =  $23.12 \mu\text{atm}$ ), while the lowest correlation coefficient was obtained for the equatorial Atlantic ocean ( $r^2 = 0.57$ ). These low scores directly reflect low data density and are to be contrasted with those obtained over regions with better data coverage (e.g. Subtropical Pacific: RMSE =  $15.86 \mu\text{atm}$ , bias =  $9.9 \mu\text{atm}$ ,  $r^2 = 0.77$  or Subpolar Atlantic: RMSE =  $22.99 \mu\text{atm}$ , bias =  $15.04 \mu\text{atm}$ ,  $r^2 = 0.76$ ). Despite large time mean differences computed over the eastern Equatorial Pacific, scores are satisfying at the regional scale indicating error compensation by improved scores over the western basin. Scores are low in the Southern hemisphere (Table 1) and time mean differences are large (Fig. 2 (a)) reflecting sparse data coverage (Fig. 1 (a)).

275

276 3.2. Qualification.

This section presents the assessment of the final time series of reconstructed surface ocean  $p\text{CO}_2$ . The time series was computed using the best monthly models as described in section 2.2, as well as 100% of data for



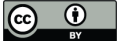

learning, evaluation and validation.

Results of the FFNN-LSCE mapping model were compared to three published mapping methods which participated in the “Surface Ocean pCO<sub>2</sub> Mapping Intercomparison” (SOCOM) exercise presented in Rödenbeck et al. (2015) (<http://www.bgc-jena.mpg.de/SOCOM/>). These methods are: (1) Jena-MLS (Rödenbeck et al., 2014), a statistical interpolation scheme (data-driven mixed-layer scheme; principal drivers: ocean-internal carbon sources/sinks, SST, wind speed, mixed-layer depth climatology, alkalinity climatology); (2) JMA-MLR (Iida et al., 2015), based on multi-linear regressions with SST, SSS and Chl *a* as independent variables, and (3) ETH-SOMFFN (Landschützer et al., 2014), a combined two-step neural network model with SST, SSS, MLD, Chl *a*, xCO<sub>2</sub> as drivers. Qualification followed methods and analyses proposed by Rödenbeck et al. (2015). The time series of pCO<sub>2</sub> and sea-air flux CO<sub>2</sub> (*f*) were assessed over 17 biomes defined by Fay and McKinley (2014) (Fig. 3, Table 2). These biomes were derived based on coherence in SST, Chl *a*, ice fraction, maximum MLD and represent regions of coherent biogeochemical dynamics.

291

We followed the protocol and diagnostics proposed in Rödenbeck et al. (2015) for the comparison of the mapping methods between each other, respectively to observations. The following diagnostics were computed: (1) the relative interannual variability (IAV) mismatch  $R^{iav}$  (in %) and (2) the amplitude of interannual variations. The relative interannual variability (IAV) mismatch  $R^{iav}$  (in %) is the ratio of the mismatch amplitude  $M^{iav}$  of the difference between the model output and observations (its temporal standard deviation) and the mismatch amplitude  $M^{iav}_{benchmark}$  of the “benchmark”. The  $M^{iav}_{benchmark}$  was derived from the mean seasonal cycle of the corresponding model output where the trend of increasing yearly atmospheric pCO<sub>2</sub> was added (see details in Rödenbeck et al., 2015). It corresponds to a climatology corrected for increasing atmospheric CO<sub>2</sub>, but without interannual variability.

$$R^{iav} = \frac{M^{iav}}{M^{iav}_{benchmark}} * 100\% \quad (6)$$

where

$$M^{iav} = std \left( mean \left( pCO_{2,Model} - pCO_{2,SOCAT} \right) \right),$$

$$M^{iav}_{benchmark} = std \left( mean \left( D_{season} \right) \right),$$

where “mean” is a mean over the region and year and

$$D_{season} = \left( pCO_{2,SS} + trend \left( CO_{2,atm} \right) \right) - pCO_{2,SOCAT},$$

pCO<sub>2,SS</sub> is the seasonal cycle of pCO<sub>2</sub> from the corresponding mapping method. CO<sub>2,atm</sub> estimates from xCO<sub>2</sub> Jena CO<sub>2</sub> inversion s76\_v4.1 were used.

$R^{iav}$  provides information on the capability of each method to reproduce the IAV compared to observations: a smaller  $R^{iav}$  stands for better fit compared to the reference. The amplitude of the interannual variations,

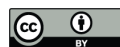

311  $A^{lav}$ , of sea-air flux of  $CO_2$  (its 2-month running mean).  $A^{lav}$  is estimated as the temporal standard deviation  
312 over the period.

313

314 3.2.1. Interannual variability.

315

316 The time series of [global](#) averaged surface ocean  $pCO_2$  over the period 2001-2016 are presented in Figure 4  
317 for FFNN-LSCE and the three other models. Surface ocean  $pCO_2$  ( $\mu atm$ ) varied between 4 mapping  
318 methods in the range of  $\pm 7 \mu atm$  (Fig. 4 (a)). Modeled  $pCO_2$  values were at the lower end for ETH-  
319 SOMFFN and JMA-MLR, while FFNN-LSCE and Jena-MLS13 computed higher values. The same  
320 behavior was found for 12-month running mean time series (Fig. 4 (b)). Figure 4 (c) shows the 12-month  
321 running mean of difference between computed  $pCO_2$  and SOCAT data (model – SOCAT) over the globe.  
322 JMA-MLR mostly underestimated observed  $pCO_2$  with a strong interannual variability of the misfit,  
323 especially at the end of the period with up to  $-5 \mu atm$ . The difference between ETH-SOMFFN output and  
324 SOCAT data fluctuates in the range of  $\pm 1 \mu atm$ , with an increase in amplitude up to  $-2 \mu atm$  from 2010  
325 onward. Jena-MLS13 overestimated observations with the difference in the range of 0-1  $\mu atm$ . The  
326 difference between FFNN-LSCE and SOCAT varies around zero between -0.7 and 1  $\mu atm$ .

327

328 The model was assessed next at biome scale. Results for all biomes are presented in the supplementary  
329 material (Fig. S2, S3, S4). Two biomes with contrasting dynamics are discussed hereafter in greater detail:  
330 (1) the Equatorial East Pacific (biome 6) characterized by a strong IAV of surface ocean  $pCO_2$  and sea-air  
331  $CO_2$  fluxes in response to ENSO, the El Niño Southern Oscillation (Feely et al., 1999; Rödenbeck et al.,  
332 2015), and (2) North Atlantic Permanently Stratified biome (biome 11) with a well-marked seasonal cycle,  
333 but little IAV (Schuster et al., 2013). Results for these biomes are presented in Figure 5.

334

335 Biome 6 is relatively well-covered by observations and represents a key region for testing the skill of the  
336 model to reproduce the observed strong IAV linked to ENSO. El Niño events are characterized by positive  
337 SST anomalies, reduced upwelling and decreased surface ocean  $pCO_2$  values. These episodes could be  
338 identified in all model time series (Fig. 5 (a)) with reduced  $pCO_2$  levels in 2004/2005 and 2006/2007 (weak  
339 El Niño), 2002/2003 and 2009/2010 (moderate El Niño), and 2015/2016 (strong El Niño). JMA-MLR (blue  
340 curve) tended to underestimate  $pCO_2$  during weak El Niño events. It was underestimated during the La  
341 Niña 2011-2012 event by Jena-MLS13. FFNN-LSCE and ETH-SOMFFN, both based on a neural network  
342 approach yielded similar results despite differences in network architecture and predictor data sets.

343

344 Data coverage is particularly high over Biome 11 (Fig. 5 (b), (d), (f)). The seasonal cycle in this biome is  
345 dominantly driven by temperature. Modeled seasonal variability showed a good agreement across the  
346 ensemble of methods (Fig. 5(b)) with an increase in spring-summer and a decrease in autumn-winter.



347 However, the amplitude can be different by up to 10  $\mu\text{atm}$  between different models. The seasonal  
348 amplitude of  $\text{pCO}_2$  computed by JMA-MLR increased from smaller values at the beginning of the time  
349 series to higher ones in the middle of the period 2005-2012. The variability of seasonal amplitude was the  
350 highest for Jena-MLS13 in line with the 12-month running mean time series (Fig. 5 (d)). Again, similar  
351 seasonal amplitude and year-to-year variability of surface ocean  $\text{pCO}_2$  were obtained with FFNN-LSCE  
352 and ETH-SOMFFN (Fig. 5 (b), (d)). The yearly  $\text{pCO}_2$  mismatch (Fig. 5 (f)) shows that observed surface  
353 ocean  $\text{pCO}_2$  was underestimated by JMA-MLR at the beginning and at the end of the period by up to -6  
354  $\mu\text{atm}$ , and overestimated during 2007-2011 by up to 8  $\mu\text{atm}$ . Jena-MLS13 shows mostly positive  
355 differences in the range 0-2  $\mu\text{atm}$  over the full period. FFNN-LSCE and ETH-SOMFFN vary around zero  
356 and between -2 – 2  $\mu\text{atm}$ , being close to each other.

357

358 3.2.2. Sea-air  $\text{CO}_2$  flux variability.

359

360 Sea-air exchange of  $\text{CO}_2$  was estimated using the same gas exchange formulation (4) and wind data speed  
361 (6-hourly NCEP wind speed) for each mapping data (Rödenbeck et al., 2005). It is worth noting that the  
362 sea-air flux is sensitive to the choice of wind speed data set (Roobaert et al., 2018).

363

364 Figure 6 (a) presents the global 12-month running mean of the air-sea  $\text{CO}_2$  flux for four mapping methods.  
365 All models showed an increase in  $\text{CO}_2$  uptake in response to increasing atmospheric  $\text{CO}_2$  levels, albeit with  
366 a strong between-model variability in multi-annual trends. There is less agreement between the methods  
367 compared to reconstructions of surface ocean  $\text{pCO}_2$  variability (Fig. 4 (b)). This results from the  
368 contribution of uncertainties in air-sea  $\text{CO}_2$  flux estimations over regions with poor data-coverage (mostly  
369 in the South Hemisphere: South Pacific, South Atlantic, Indian Ocean, South Ocean; see Fig. S5).  
370 Nevertheless, the relative IAV mismatch was less than 30% for all methods (Fig. 6 (b)), suggesting a  
371 reasonable fit to observational data. The relative IAV mismatch is, however, a global score and it is biased  
372 towards regions with good data coverage (Rödenbeck et al., 2015). The time series reconstructed in this  
373 study is too short to capture decadal variations and in particular the strengthening of the sink from 2000  
374 onward (Landschützer et al., 2016). FFNN-LSCE computed a slowdown of ocean  $\text{CO}_2$  uptake between  
375 2010 and 2013 with a flux of  $\sim -1.8 \text{ GtC yr}^{-1}$  compared to  $\sim -2.2 \text{ GtC yr}^{-1}$  for ETH-SOMFFN. A leveling-off  
376 was also found for JMA-MLR, albeit shifted in time. In general, the amplitudes of reconstructed  $\text{CO}_2$  fluxes  
377 across all four methods agreed within 0.2-0.36  $\text{PgC/yr}$ . The weighted mean of IAV (horizontal line in Fig. 6  
378 (b)) computed from the four methods included here was 0.253  $\text{PgC/yr}$ . This value is close to the one of  
379 Rödenbeck et al. (2015) for the complete ensemble of SOC models (0.31  $\text{PgC/yr}$ ) estimated for the  
380 period 1992-2009. The largest amplitude was obtained for ETH-SOMFFN,  $\sim 0.348 \text{ PgC/yr}$ . On the other  
381 hand, FFNN-LSCE has the smallest amplitude with 0.206  $\text{PgC/yr}$ . Jena-MLS13 and JMA-MLR lie very  
382 close to the weighted mean value with 0.257  $\text{PgC/yr}$  and 0.221  $\text{PgC/yr}$ , respectively. The weighted mean



and the dispersion of individual models around it, reflect the period of analysis (2001-2015, ETH-SOMFFN output provided up to 2015) and the total number of models contributing to it (see for comparison Rödenbeck et al., 2015). As such it does not provide information on the skill of any particular model.

The interannual variability of reconstructed sea-air CO<sub>2</sub> fluxes (12-month running mean) showed a good agreement for biome 6 (East Pacific Equatorial, Fig. 7 (a)). A small discrepancy was found at the beginning of the period. A strong increase was computed by Jena-MLS13 for 2010-2014 that was also identified on pCO<sub>2</sub> variability (Fig. 5 (a)). Despite this Jena-MLS13 has a low relative IAV (26.24%). This confirms a tendency mentioned in Rödenbeck et al. (2015) that mapping products with a small IAV show larger amplitude. FFNN-LSCE and ETH-SOMFFN yielded comparable results (Fig. 7 (a), (c)) with relative IAV mismatches of 46.13% and 53.26%, respectively, and with amplitudes ~ 0.03 PgC/yr. Interannual variability reproduced by JMA-MLR falls within the range of the other models (Fig. 7 (c)), but with a R<sup>IAV</sup> of ~68.46%.

Reconstructed sea-air CO<sub>2</sub> fluxes over the North Atlantic Subtropical Permanently Stratified region (biome 11) show large between model differences in amplitudes and variability. The two models based on a neural network show again a good agreement with R<sup>IAV</sup> of 17% for FFNN-LSCE and 20% for ETH-SOMFFN. Jena-MLS13 produced a strong seasonal variability (Fig. 7 (b)) up to 0.06 PgC/yr, and small R<sup>IAV</sup> of ~11%. JMA-MLR did not reproduce a decrease of sea-air CO<sub>2</sub> at the middle of period by up to 0.02 PgC/yr (Fig. 7 (b)). The model is characterized by a R<sup>IAV</sup> of 46.48% and an amplitude of 0.013 PgC/yr.

3.3. Sea-air CO<sub>2</sub> flux trend.

The long-term trend of sea-air CO<sub>2</sub> fluxes is dominantly driven by the increase in atmospheric CO<sub>2</sub> (see Fig. S7). On shorter time scales, such as for the period 2001-2016, the interannual variability at regional scale reflects natural mode of climate variability and local oceanographic dynamics (Heinze et al., 2015).

Figure 8 shows the linear trends of sea-air CO<sub>2</sub> fluxes for FFNN-LSCE (a), Jena-MLS13 (b), ETH-SOMFFN (c) and JMA-MLR (d). A total negative trend was computed for all models, albeit with large regional contrasts, and FFNN-LSCE falls within the range: Jena-MLS13, -0.0028 PgC/yr; FFNN-LSCE, -0.0032 PgC/yr; JMA-MLR, -0.0037 PgC/yr; ETH-SOMFFN, -0.0059 PgC/yr. FFNN-LSCE computed negative trends over most of the Atlantic basin, Indian Ocean and South of 40°S, which contrasts with decreasing fluxes over the Pacific and locally in the Antarctic Circumpolar current. At first order this broad regional pattern is found in all models. Regional maxima and minima are, however, more pronounced in Jena-MLS13 (Fig. 8 (b)) and ETH-SOMFFN (Fig. 8 (c)), while a patchy distribution at sub-basin scale is



419 diagnosed for JMA-MLR.

420

421 The agreement in sign of computed linear trends from four models is presented in Fig. 9. Over most of the  
422 ocean, all four models show very close sea-air CO<sub>2</sub> tendency. In the Indian Ocean (biome 14), on the other  
423 hand a positive trend was computed for JMA-MLR (0.0004 PgC/yr) while the three other models present a  
424 negative trend. These differences between models were also found in the Pacific Ocean, especially the  
425 Southern Pacific. In the Eastern Equatorial Pacific region (biome 6) a total negative trend equal to  
426  $-4.03 \times 10^{-5}$  PgC/yr was computed for ETH-SOMFFN, which contrasts with positive trends suggested by  
427 FFNN-LSCE ( $6.68 \times 10^{-5}$  PgC/yr) and Jena-MLS13 ( $3 \times 10^{-4}$  PgC/yr). All models reproduced a maximum in  
428 the southern part of biome 6 but they disagree about its amplitude and spatial distribution. Almost  
429 everywhere over the Atlantic Ocean the mapping methods produced the same sign of linear trend (Fig. 9).  
430 Only in the eastern part of the subtropical North Atlantic Jena-MLS13 gave a positive linear trend of fCO<sub>2</sub>  
431 (Fig. 8 (b)).

432

433 According to FFNN-LSCE, the global ocean took up in average 1.55 PgC/yr between 2001-2015. This  
434 estimate is consistent with results from the other three models (Table 3) (see Table S1 for estimations per  
435 biomes). The spread between individual models falls in the range of the error reported in Landschützer et  
436 al. (2016),  $\pm 0.4$ -0.6 PgC/yr. Per biome, estimates of CO<sub>2</sub> sea-air fluxes provided by FFNN-LSCE are  
437 similarly in good agreement with those derived from the other models.

438

#### 439 4. Summary and conclusion.

440

441 We proposed a new model for the reconstruction of monthly surface ocean pCO<sub>2</sub>. The model is applied  
442 globally and allows a seamless reconstruction without introducing boundaries between the ocean basins or  
443 biomes. Our model relies on a two-step approach based on Feed-Forward Neural Networks (FFNN-LSCE).  
444 The first step corresponds to the reconstruction of a monthly pCO<sub>2</sub> climatology. It allows us to keep the  
445 output of the FFNN close to the observed values in the region with the poor data cover. Moreover, it allows  
446 to include a potential change in seasonal cycle in response to climate change from drivers to carbon cycle  
447 variables. At the second step pCO<sub>2</sub> anomalies are reconstructed according to climatology from the first step.  
448 The model was applied over the period 2001-2016. Validation with independent data at global scale  
449 indicated an accuracy of 17.57  $\mu$ atm,  $r^2$  of  $\sim 0.76$  and an absolute bias of 11.52  $\mu$ atm. In order to assess the  
450 model further, it was compared to three different mapping models: ETH-SOMFFN (self-organizing maps +  
451 neural network), Jena-MLS13 (statistical interpolation), JMA-MLR (linear regression) (Rödenbeck et al.,  
452 2015). Network qualification followed the protocol and diagnostics proposed in Rödenbeck et al. (2015).  
453 Reconstructed surface ocean pCO<sub>2</sub> distributions were in good agreement with other models and  
454 observations. The seasonal variability was reproduced satisfyingly by FFNN-LSCE, the yearly pCO<sub>2</sub>



455 mismatch varied around zero, and relative IAV mismatch was 7.55%. FFNN-LSCE proved skillful in  
456 reproducing the interannual variability of surface ocean pCO<sub>2</sub> over the Eastern Equatorial Pacific in  
457 response to ENSO. Reductions in surface ocean pCO<sub>2</sub> during El Niño events were well reproduced. The  
458 comparison between reconstructed and observed pCO<sub>2</sub> values yielded a RMSE of 15.73 μatm, r<sup>2</sup> of 0.79  
459 and an absolute bias of 10.33 μatm over the Equatorial Pacific. The relative IAV misfit in this region was  
460 ~17%. Despite an overall good agreement between models, important differences still exist at the regional  
461 scale, especially in the Southern hemisphere and in particular, the Southern Pacific and the Indian Ocean.  
462 These regions suffer from poor data-coverage. Large regional uncertainties in reconstructed surface ocean  
463 pCO<sub>2</sub> and sea-air CO<sub>2</sub> fluxes have a strong influence on global estimates of CO<sub>2</sub> fluxes and trends.

464

465

466 **Code and data availability.**

467

468 Python code for pCO<sub>2</sub> climatology reconstruction, 1<sup>st</sup> step of FFNN-LSCE model:

469 <https://files.lsce.ipsl.fr/public.php?service=files&t=016351132f69db55f1e6eda948665237>

470

471 Python code for reconstruction of pCO<sub>2</sub> anomalies, 2<sup>nd</sup> step of FFNN-LSCE model:

472 <https://files.lsce.ipsl.fr/public.php?service=files&t=9304199cf79efd688837e891383287c3>

473

474 Data of FFNN-LSCE pCO<sub>2</sub> are available on request: [anna.sommer.lab@gmail.com](mailto:anna.sommer.lab@gmail.com)

475

476 **Author contribution.**

477 ADS, MG, MV and CM contributed to the development of the methodology and designed the experiments,  
478 ADS carried them out. ADS developed the model code and performed the simulations. ADS prepared the  
479 manuscript with contributions from all co-authors.

480

481

482 **Acknowledgments.**

483 Authors would like to thank Frederic Chevallier and Gilles Reverdin for their suggestions. Authors would  
484 like to gratefully acknowledge funding by the AtlantOS project (EU Horizon 2020 research and innovation  
485 program, grant agreement no. 2014-633211). MV also acknowledges funding by the CoCliServ project  
486 (ERA4CS program).

487

488 **References**

489

490 Aumont, O., and Bopp, L.: Globalizing results from ocean in situ iron fertilization studies, Global  
491 Biogeochem. Cycles, 20, GB2017, doi:10.1029/2005GB002591, 2006.

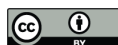

492  
493Bakker, D. C. E., Pfeil, B., Landa, C. S., Metzl, N., O'Brien, K. M., Olsen, A., Smith, K., Cosca, C.,  
494Harasawa, S., Jones, S. D., Nakaoka, S.-I. et al.: A multi-decade record of high-quality fCO<sub>2</sub> data in version  
4953 of the Surface Ocean CO<sub>2</sub> Atlas (SOCAT), *Earth Syst. Sci. Data*, 8, 383–413,  
496<https://doi.org/10.5194/essd-8-383-2016>, 2016.  
497  
498Bishop, C.M.: *Neural Networks for Pattern Recognition*, Oxford Univ. Press, Cambridge, U. K., 1995.  
499  
500Bricaud, A., Meija, C., Blondeau-Patissier, D., Claustre, H., Crepon, M., and Thiria, S.: Retrieval of  
501pigment concentrations and size structure of algal populations from the absorption spectra using  
502multilayered perceptrons, *Appl. Opt.*, 46, 8, 1251–1260, 2006.  
503  
504Chollet, F., et al.: Keras. <https://keras.io>, 2015.  
505  
506Ciais P., Sabine C., Bala G. et al.: Carbon and other biogeochemical cycles. In: *Climate Change 2013: The*  
507*Physical Science Basis. Contribution of Working Group I to the Fifth Assessment Report of the*  
508Intergovernmental Panel on Climate Change[Stocker, T. F., D. Qin, G.-K. Plattner, M. Tignor, S. K. Allen,  
509J. Boschung, A. Nauels, Y. Xia, V. Bex and P. M. Midgley (eds.)]. Cambridge University Press, Cambridge,  
510United Kingdom and New York, NY, USA, 2013.  
511  
512Donlon, C.J., Martin, M., Stark, J.D., Roberts-Jones, J., Fiedler, E., and Wimmer, W.: The Operational Sea  
513Surface Temperature and Sea Ice analysis (OSTIA), *Remote Sensing of the Environment*, doi:  
51410.1016/j.rse.2010.10.017, 2011.  
515  
516Fay, A. R. and McKinley, G. A.: Global open-ocean biomes: mean and temporal variability, *Earth Syst. Sci.*  
517*Data*, 6, 273–284, doi:10.5194/essd-6-273-2014, 2014.  
518  
519Fay, A.R., McKinley, G.A., and Lovenduski, N.S.: Southern Ocean carbon trends: Sensitivity to methods,  
520*Geophys. Res. Lett.*, 41, 6833–6840, doi:10.1002/2014GL061324, 2014.  
521  
522Feely, R. A., Wanninkhof, R., Takahashi, T., and Tans, P.: Influence of El Niño on the equatorial Pacific  
523contribution to atmospheric CO<sub>2</sub> accumulation, *Nature*, 398, 597–601, 1999.  
524  
525Friedrich, T., and Oschlies, A.: Basin-scale pCO<sub>2</sub> maps estimated from ARGO float data: A model study, *J.*  
526*Geophys. Res.*, 114, C10012, doi:10.1029/2009JC005322, 2009a.  
527  
528Friedrich, T., and Oschlies, A.: Neural network-based estimates of North Atlantic surface pCO<sub>2</sub> from  
529satellite data: A methodological study, *J. Geophys. Res.*, 114, C03020, doi: 10.1029/2007JC004646, 2009b.  
530  
531Gross, L., Thiria, S., Frouin, R., and Mitchell, B.G.: Artificial neural networks for modeling transfer  
532function between marine reflectance and phytoplankton pigment concentration, *J. Geophys. Res.*, 105, C2,  
5333483–3949, doi: 10.1029/1999jc900278, 2000.  
534  
535Hinton, G., Srivastava, N., and Swersky, K.: Lecture 6a: Overview of mini-batch gradient descent. *Neural*  
536*Networks for Machine Learning. Slides:*  
537[http://www.cs.toronto.edu/~tijmen/csc321/slides/lecture\\_slides\\_lec6.pdf](http://www.cs.toronto.edu/~tijmen/csc321/slides/lecture_slides_lec6.pdf), 2012.  
538  
539Iida, Y., Kojima, A., Takatani, Y., Nakano, T., Midorikawa, T., and Ishii, M.: Trends in pCO<sub>2</sub> and sea-air  
540CO<sub>2</sub> flux over the global open oceans for the last two decades, *J. Oceanogr.*, 71, 637–661,  
541doi:10.1007/s10872-015-0306-4, 2015.  
542  
543Kalnay, E., Kanamitsu, M., Kistler, R., Collins, W., Deaven, D., Gandin, L., Iredell, M., Saha, S., White,  
544G., Woollen, J., Zhu, Y., Chelliah, M., Ebisuzaki, W., Higgins, W., Janowiak, J., Mo, K. C., Ropelewski, C.,





- 545Wang, J., Leetmaa, A., Reynolds, R., Jenne, R., and Joseph, D.: The NCEP/NCAR 40-year reanalysis  
546project, B. Am. Meteorol. Soc., 77, 437–471, 1996.
- 547
- 548Kallache, M., Vrac, M., Naveau, P., Michelangeli, P.-A.: Non-stationary probabilistic downscaling of  
549extreme precipitation, J. Geophys. Res. - Atmospheres, 116, D05113, doi:10.1029/2010JD014892, 2011.
- 550
- 551Körtzinger, A.: Methods of Seawater Analysis, chap. Determination of carbon dioxide partial pressure  
552(pCO<sub>2</sub>), 149–158, Verlag Chemie, 1999.
- 553
- 554Landschützer, P., Gruber, N., Bakker, D. C. E., Schuster, U., Nakaoka, S., Payne, M. R., Sasse, T. P., and  
555Zeng, J.: A neural network-based estimate of the seasonal to inter-annual variability of the Atlantic Ocean  
556carbon sink, Biogeosciences, 10, 7793–7815, <https://doi.org/10.5194/bg-10-7793-2013>, 2013.
- 557
- 558Landschützer, P., Gruber, N., Bakker, D. C. E., and Schuster, U.: Recent variability of the global ocean  
559carbon sink, Global Biogeochem. Cy., 28, 927–949, <https://doi.org/10.1002/2014GB004853>, 2014.
- 560
- 561Landschützer, P., Gruber, N. & Bakker, D. C. E.: Decadal variations and trends of the global ocean carbon  
562sink, Glob. Biogeochem. Cycles, 30, 1396–1417, <https://doi.org/10.1002/2015GB005359>, 2016.
- 563
- 564Laruelle, G. G., Landschützer, P., Gruber, N., Tison, J.-L., Delille, B., and Regnier, P.: Global high-  
565resolution monthly pCO<sub>2</sub> climatology for the coastal ocean derived from neural network interpolation,  
566Biogeosciences, 14, 4545–4561, <https://doi.org/10.5194/bg-14-4545-2017>, 2017.
- 567
- 568Lefèvre, N., Watson, A. J., and Watson, A. R.: A comparison of multiple regression and neural network  
569techniques for mapping *in situ* pCO<sub>2</sub> data, Tellus, 57B, 375–384,  
570<https://doi.org/10.3402/tellusb.v57i5.16565>, 2005.
- 571
- 572Le Quéré, C., and Coauthors: Two decades of ocean CO<sub>2</sub> sink and variability, Tellus, 55B, 649–656,  
573<https://doi.org/10.1034/j.1600-0889.2003.00043.x>, 2003.
- 574
- 575Le Quéré, C., Takahashi, T., Buitenhuis, E. T., Rödenbeck, C., and Sutherland, S. C.: Impact of climate  
576change and variability on the global oceanic sink of CO<sub>2</sub>, Glob. Biogeochem. Cy., 24, GB4007,  
577doi:10.1029/2009GB003599, 2010.
- 578
- 579Le Quéré, C., Andrew, R. M., Friedlingstein, P., Sitch, S., Pongratz, J., Manning, A. C., et al.: Global  
580carbon budget 2017, Earth System Science Data, 10 (1), 405–448. <https://doi.org/10.5194/essd-10-405-5812018>, 2018.
- 582
- 583Majkut, J. D., Carter, B.R., Frölicher, T.L., Dufour, C.O., Rodgers, K.B., and Sarmiento, J.L.: An observing  
584system simulation for Southern Ocean carbon dioxide uptake, Philos. Trans. Roy. Soc. London, A372,  
58520130046, doi:<https://doi.org/10.1098/rsta.2013.0046>, 2014.
- 586
- 587Mejia, C., Thiria, S., Tran, N., and Crepon, M.: Determination of the Geophysical Model Function of ERS1  
588Scatterometer by the use of Neural Networks, J. Geophys. Res., Vol. 103, No. C6, PP 12853–12868,  
589<https://doi.org/10.1029/97JC02178>, 1998.
- 590
- 591Menemenlis, D., Campin, J., Heimbach, P., Hill, C., Lee, T., Nguyen, A., Schodlok, M., and Zhang, H.:  
592ECCO2: High resolution global ocean and sea ice data synthesis, Mercator Ocean, Quarterly Newsletter,  
59331, 13–21, 2008.
- 594
- 595Nakaoka, S., Telszewski, M., Nojiri, Y., Yasunaka, S., Miyazaki, C., Mukai, H., and Usui, N.: Estimating  
596temporal and spatial variation of ocean surface pCO<sub>2</sub> in the North Pacific using a self-organizing map  
597neural network technique, Biogeosciences, 10, 6093–6106, doi:10.5194/bg-10-6093-2013, 2013.





598  
599Organelli, E., Barbieux, M., Claustre, H., Schmechtig, C., Poteau, A., Bricaud, A., Boss, E., Briggs, N.,  
600Dall'Olmo, G., D'Ortenzio, F., Leymarie, E., Mangin, A., Obolensky, G., Penkerch, C., Prieur, L., Roesler,  
601C., Serra, R., Uitz, J., and Xing, X.: Two databases derived from BGC-Argo float measurements for marine  
602biogeochemical and bio-optical applications, *Earth Syst. Sci. Data*, 9, 861-880,  
603<https://doi.org/10.5194/essd-9-861-2017>, 2017.

604  
605Orr, J. C., Monfray, P., Maier-Reimer, E., Mikolajewicz, U., Palmer, J., Taylor, N. K., Toggweiler, J. R.,  
606Sarmiento, J. L., Quere, C. L., Gruber, N., Sabine, C. L., Key, R. M. and Boutin, J.: Estimates of  
607anthropogenic carbon uptake from four three-dimensional global ocean models, *Global Biogeochem. Cycl.*,  
60815, 43–60, <https://doi.org/10.1029/2000GB001273>, 2001.

609  
610Peylin, P., Bousquet, P., Le Quéré, C., Sitch, S., Friedlingstein, P., McKinley, G., Gruber, N., Rayner, P.,  
611and Ciais, P.: Multiple constraints on regional CO<sub>2</sub> flux variations over land and oceans, *Glob.*  
612*Biogeochem. Cycles*, 19, GB1011, <https://doi.org/10.1029/2003GB002214>, 2005.

613  
614Peylin, P., Law, R. M., Gurney, K. R., Chevallier, F., Jacobson, A. R., Maki, T., Niwa, Y., Patra, P. K.,  
615Peters, W., Rayner, P. J., Rödenbeck, C., van der Laan-Luijkx, I. T., and Zhang, X.: Global atmospheric  
616carbon budget: results from an ensemble of atmospheric CO<sub>2</sub> inversions, *Biogeosciences*, 10, 6699-6720,  
617<https://doi.org/10.5194/bg-10-6699-2013>, 2013.

618  
619Rödenbeck, C.: Estimating CO<sub>2</sub> sources and sinks from atmospheric mixing ratio measurements using a  
620global inversion of atmospheric transport, Technical Report 6, Max Planck Institute for Biogeochemistry,  
621Jena, available at: [http://www.bgc-jena.mpg.de/uploads/Publications/TechnicalReports/tech\\_report6.pdf](http://www.bgc-jena.mpg.de/uploads/Publications/TechnicalReports/tech_report6.pdf),  
6222005.

623  
624Rödenbeck, C., Bakker, D. C. E., Metzl, N., Olsen, A., Sabine, C., Cassar, N., Reum, F., Keeling, R. F., and  
625Heimann, M.: Interannual sea-air CO<sub>2</sub> flux variability from an observation-driven ocean mixed-layer  
626scheme, *Biogeosciences*, 11, 4599–4613, doi:10.5194/bg-11-4599-2014, 2014.

627  
628Rödenbeck, C., Bakker, D. C. E., Gruber, N., Iida, Y., Jacobson, A. R., Jones, S., Landschützer, P. et al.:  
629Data-based estimates of the ocean carbon sink variability—first results of the Surface Ocean pCO<sub>2</sub>  
630Mapping intercomparison (SOCOM), *Biogeosciences*, 12, 7251–7278, [https://doi.org/10.5194/bg-12-7251-](https://doi.org/10.5194/bg-12-7251-2015)  
6312015, 2015.

632  
633Rodgers, K. B., Key, R. M., Gnanadesikan, A., Sarmiento, J. L., Aumont, O., Bopp, L. et al.: Using  
634altimetry to help explain patchy changes in hydrographic carbon measurements, *J. Geophys. Res.*, 114,  
635C09013, doi:10.1029/2008JC005183, 2009.

636  
637Roobaert, A., Laruelle, G. G., Landschützer, P., and Regnier, P.: Uncertainty in the global oceanic CO<sub>2</sub>  
638uptake induced by wind forcing: quantification and spatial analysis, *Biogeosciences*, 15, 1701-1720,  
639<https://doi.org/10.5194/bg-15-1701-2018>, 2018.

640  
641Rumelhart, D.E., Hinton, G.E., & Williams, R.J.: Learning internal representations by backpropagating  
642errors, *Nature*, 323, 533–536, 1986.

643  
644Sauzède, R., Claustre, H., Uitz, J., Jamet, C., Dall'Olmo, G., D'Ortenzio, F., Gentili, B., Poteau, A., and  
645Schmechtig, C.: A neural network-based method for merging ocean color and Argo data to extend surface  
646bio-optical properties to depth: Retrieval of the particulate backscattering coefficient, *J. Geophys. Res.*  
647*Oceans*, 121, 2552–2571, doi:10.1002/2015JC011408, 2016.

648  
649Schuster, U., McKinley, G. A., Bates, N., Chevallier, F., Doney, S. C., Fay, A. R., González-Dávila, M.,  
650Gruber, N., Jones, S., Krijnen, J., Landschützer, P., Lefèvre, N., Manizza, M., Mathis, J., Metzl, N., Olsen,

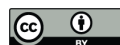

651A., Rios, A. F., Rödenbeck, C., Santana-Casiano, J. M., Takahashi, T., Wanninkhof, R., and Watson, A. J.:  
652An assessment of the Atlantic and Arctic sea–air CO<sub>2</sub> fluxes, 1990–2009, *Biogeosciences*, 10, 607–627,  
653<https://doi.org/10.5194/bg-10-607-2013>, 2013.

654  
655Takahashi, T., Sutherland, S.C., Wanninkhof, R., Sweeney, C., Feely, R.A., Chipman, D.W., Hales, B.,  
656Friederich, G., Chavez, F., Sabine, C., et al.: Climatological mean and decadal change in surface ocean  
657pCO<sub>2</sub>, and net sea–air CO<sub>2</sub> flux over the global oceans, *Deep.-Sea Res. II*, 56(8–10), 554–577,  
658<https://doi.org/10.1016/j.dsr2.2008.12.009>, 2009.

659  
660Takahashi, T., Sutherland, S. C., Sweeney, C., Poisson, A., Metzl, N. et al.: Global sea–air CO<sub>2</sub> flux based  
661on climatological surface ocean pCO<sub>2</sub>, and seasonal biological and temperature effects, *Deep.-Sea Res. II*,  
66249, 1601–1622, [https://doi.org/10.1016/S0967-0645\(02\)00003-6](https://doi.org/10.1016/S0967-0645(02)00003-6), 2002.

663  
664Telszewski, M., Chazottes, A., Schuster, U., Watson, A. J., Moulin, C., Bakker, D. C. E., González-Dávila,  
665M., Johannessen, T., Körtzinger, A., Lüger, H., Olsen, A., Omar, A., Padin, X. A., Ríos, A. F., Steinhoff, T.,  
666Santana-Casiano, M., Wallace, D.W.R., and Wanninkhof, R.: Estimating the monthly pCO<sub>2</sub> distribution in  
667the North Atlantic using a self-organizing neural network, *Biogeosciences*, 6, 1405–1421, doi:10.5194/bg-  
6686-1405-2009, 2009.

669  
670Wanninkhof, R.: Relationship between wind speed and gas exchange over the ocean, *J. Geophys. Res.-*  
671*Oceans*, 97, 7373–7382, <https://doi.org/10.1029/92JC00188>, 1992.

672  
673Weiss, R.: Carbon dioxide in water and seawater: the solubility of a non-ideal gas, *Mar. Chem.*, 2, 203–205,  
674[https://doi.org/10.1016/0304-4203\(74\)90015-2](https://doi.org/10.1016/0304-4203(74)90015-2), 1974.

675  
676Williams, N.L., Juraneck, L.W., Feely, R.A., Johnson, K.S., Sarmiento, J.L., Talley, L.D., Dickson, A.G.,  
677Gray, A.R., Wanninkhof, R., Russell, J.L., Riser, S.C., Takeshita, Y.: Calculating surface ocean pCO<sub>2</sub> from  
678biogeochemical Argo floats equipped with pH: An uncertainty analysis, *Global Biogeochemical Cycles*,  
67931:591–604, <https://doi.org/10.1002/2016GB005541>, 2017.

680  
681Zeng, J., Nojiri, Y., Landschützer, P., Telszewski, M., and Nakaoka, S.: A global surface ocean fCO<sub>2</sub>  
682climatology based on a feed-forward neural network, *J. Atmos. Ocean Technol.*, 31, 1838–1849,  
683<https://doi.org/10.1175/JTECH-D-13-00137.1>, 2014.

684

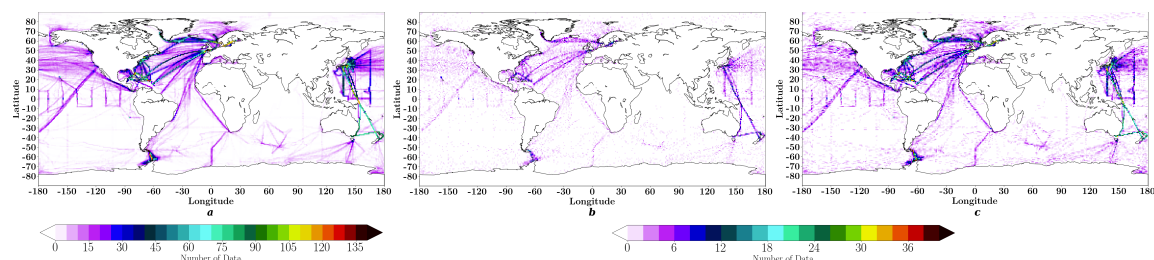

**Figure 1: Spatial distribution of SOCAT data (number of measurements per grid point): (a) - period 2001-2016; (b) - all months January for period 2001-2016; (c) - all months December-January-February for period 2001-2016.**

687  
688



689

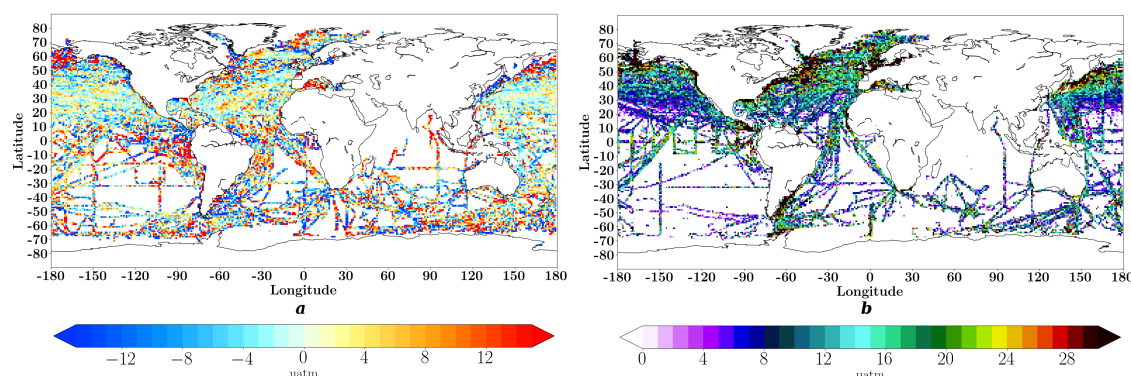

**Figure 2: Time mean differences (uatm) (a) between monthly FFNN-LSCE pCO<sub>2</sub> and SOCAT pCO<sub>2</sub> data used for evaluation of the model over the period 2001-2016 and its std (b).**

691

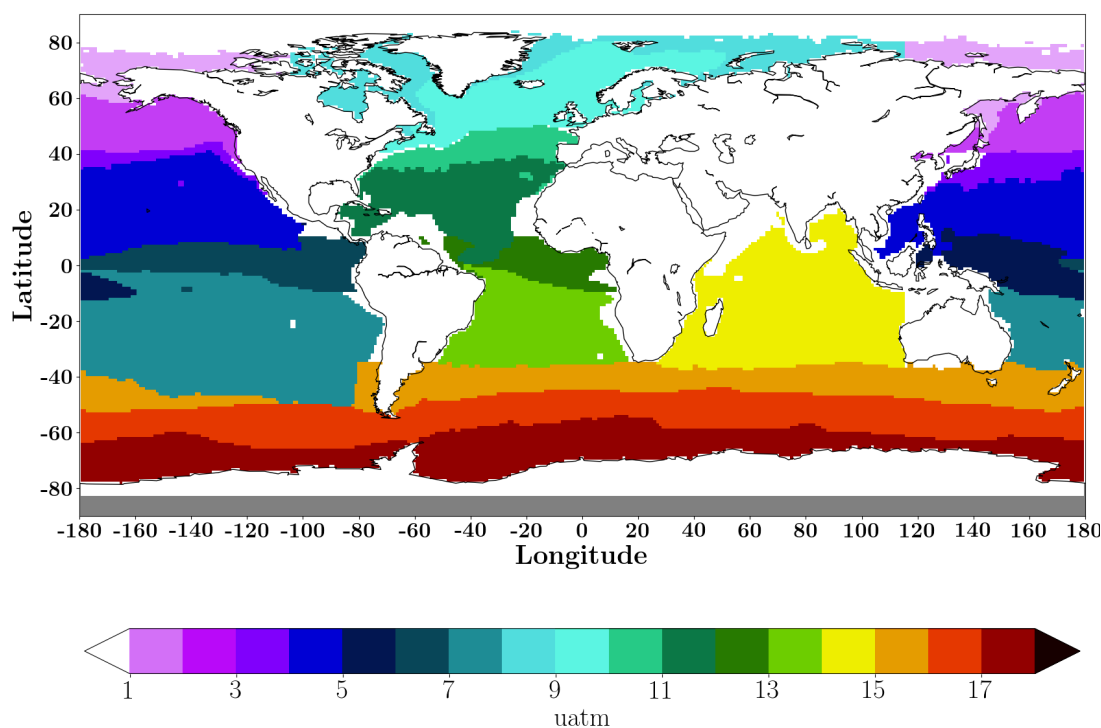

**Figure 3: Map of biomes (after Rodenbeck et al. (2015); and Fay and McKinley (2014)) used for comparison. See table 2 for biome names.**



693

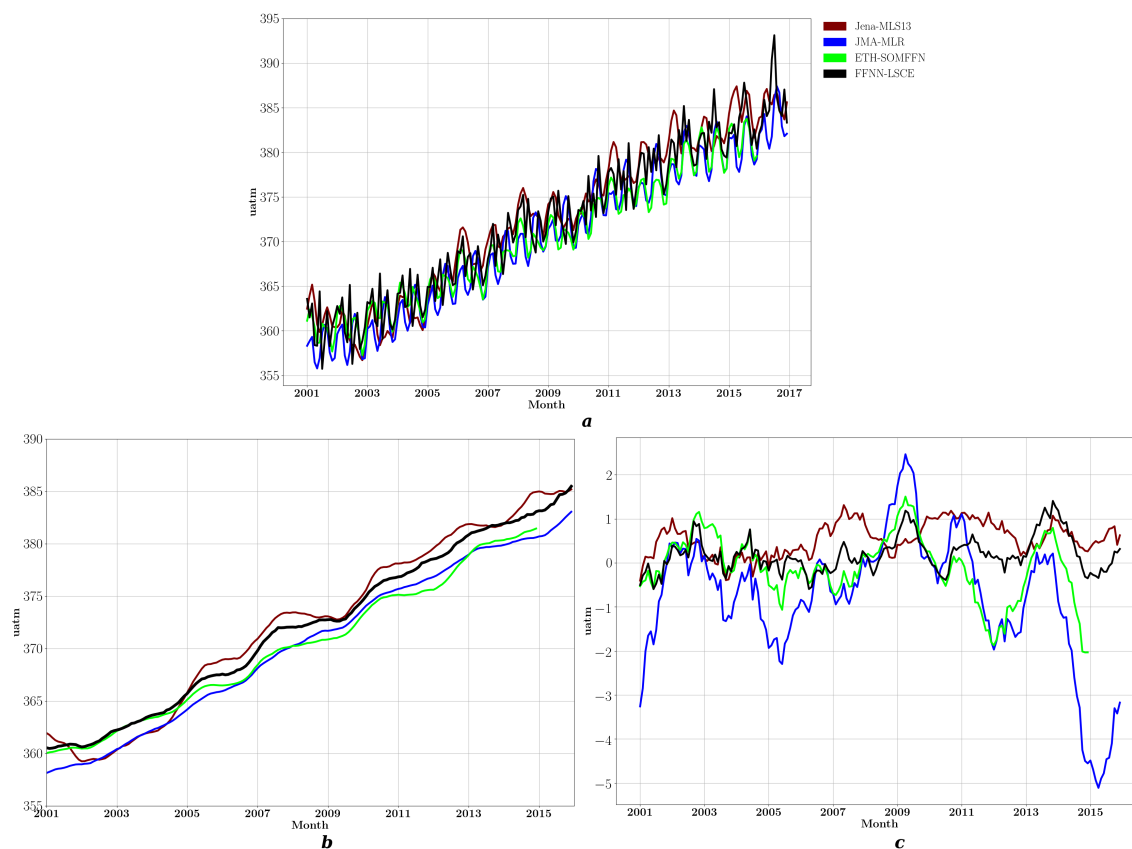

**Figure 4: Global oceanic pCO<sub>2</sub>: black - FFNN-LSCE, blue - JMA, brown - Jena, green - ETH-SOMFFN; (a) - monthly time series averaged over the glob, (b) - 12-month running mean averaged over the glob, (c) - yearly pCO<sub>2</sub> mismatch (difference of mapping methods and SOCAT data).**



695

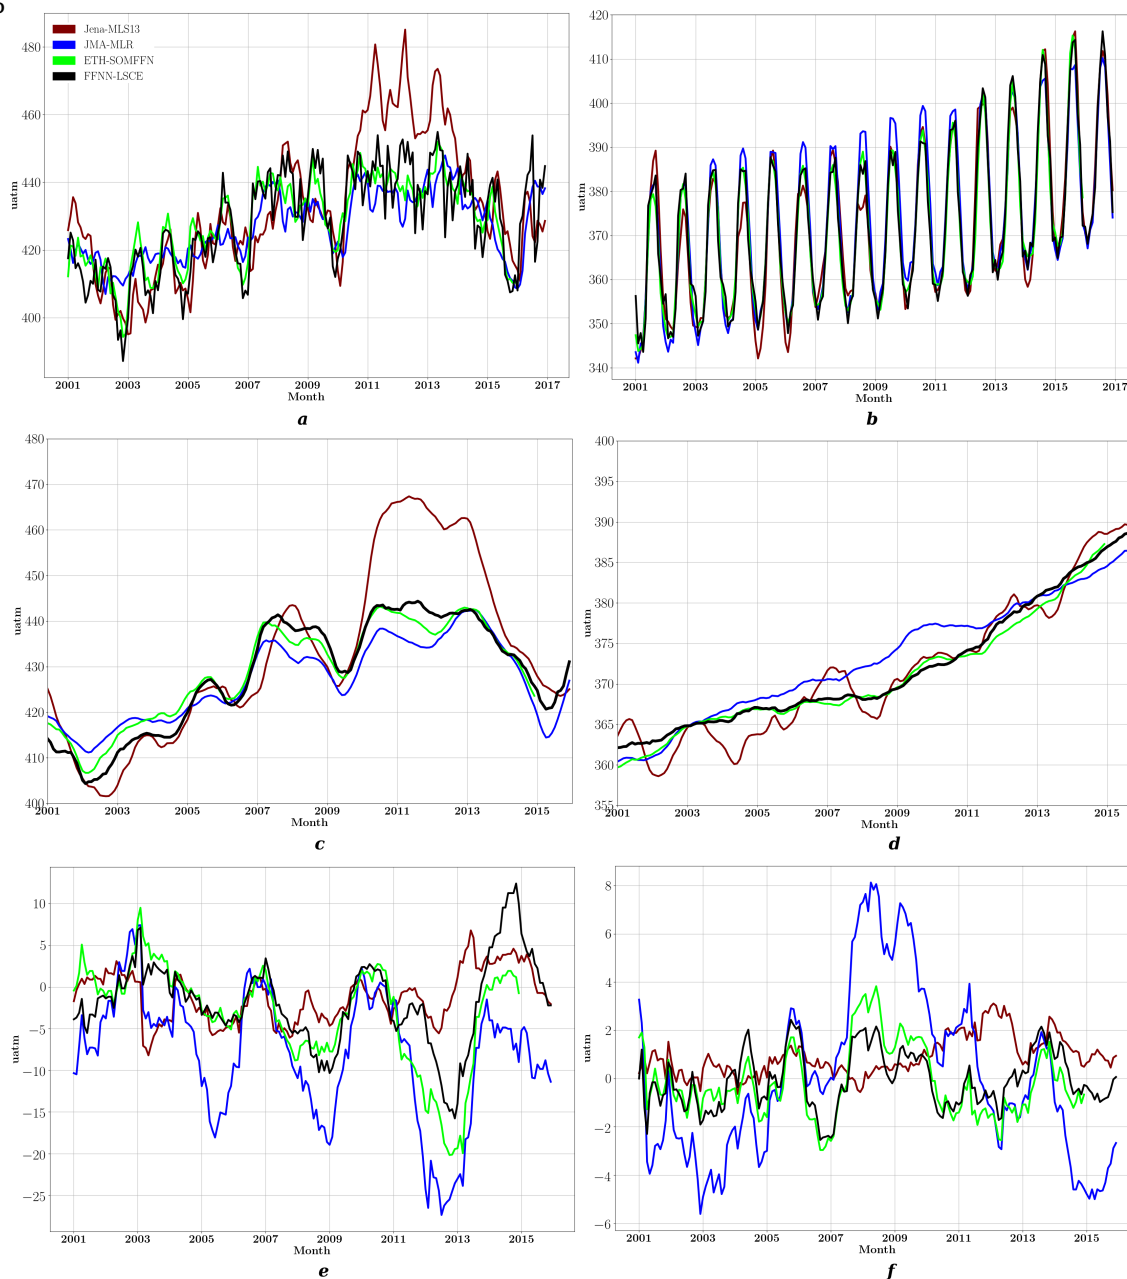

**Figure 5: East Pacific Equatorial (biome 6) (left) and North Atlantic Subtropical Permanently Stratified (biome 11) (right) oceanic  $\text{pCO}_2$ : black – FFNN, blue – JMA, brown – Jena, green – ETH-SOMFFN; (a), (b) – monthly time series averaged over biome; (c), (d) – 12-month running mean averaged over biome; (e), (f) – yearly  $\text{pCO}_2$  mismatch (difference of mapping methods and SOCAT data).**

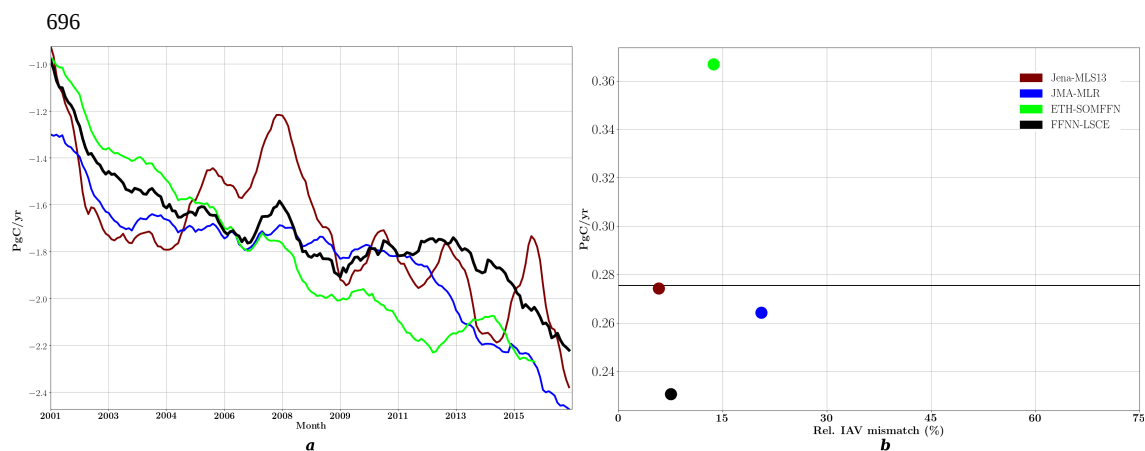

**Figure 6: (a) – Interannual sea-air CO<sub>2</sub> flux (12-month running mean) in the global ocean; (b) – amplitude of interannual CO<sub>2</sub> flux plotted against the relative IAV mismatch amplitude. The weighted mean is given as a horizontal line.**

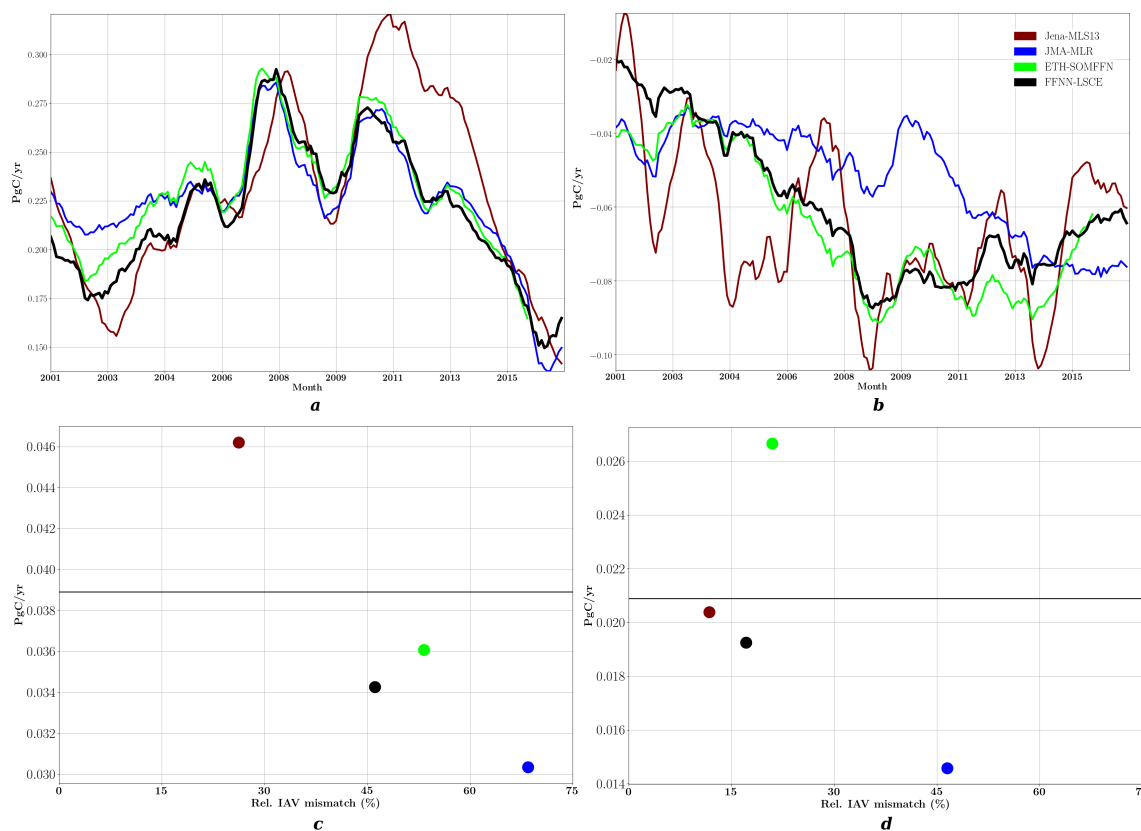

**Figure 7: East Pacific Equatorial (biome 6) (left) and North Atlantic Subtropical Permanently Stratified (biome 11) (right): (a), (b) – Interannual sea-air CO<sub>2</sub> flux (12-month running mean) in the global ocean; (c), (d) – amplitude of interannual CO<sub>2</sub> flux plotted against the relative IAV mismatch amplitude. The weighted mean is given as a horizontal line.**

700



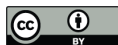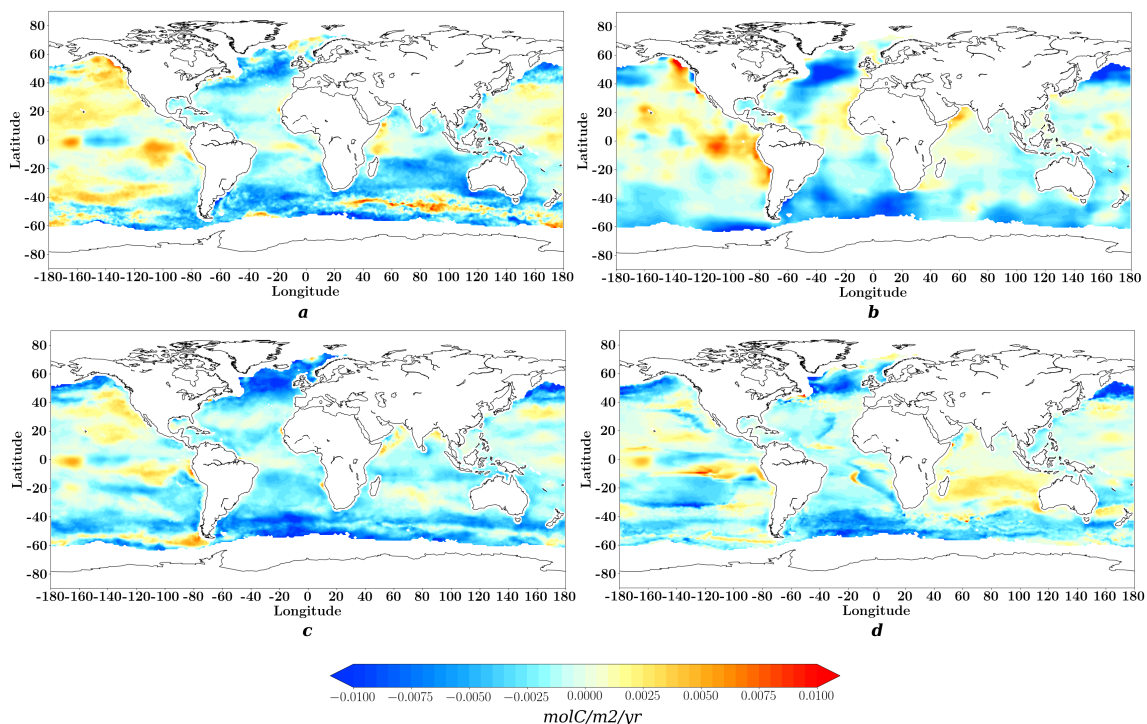

**Figure 8: Linear trend of  $f\text{CO}_2$  for common period 2001-2015: (a) – FFNN-LSCE; (b) – Jena-MLS13; (c) – ETH-SOMFFN; (d) – JMA-MLR.**

702



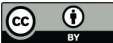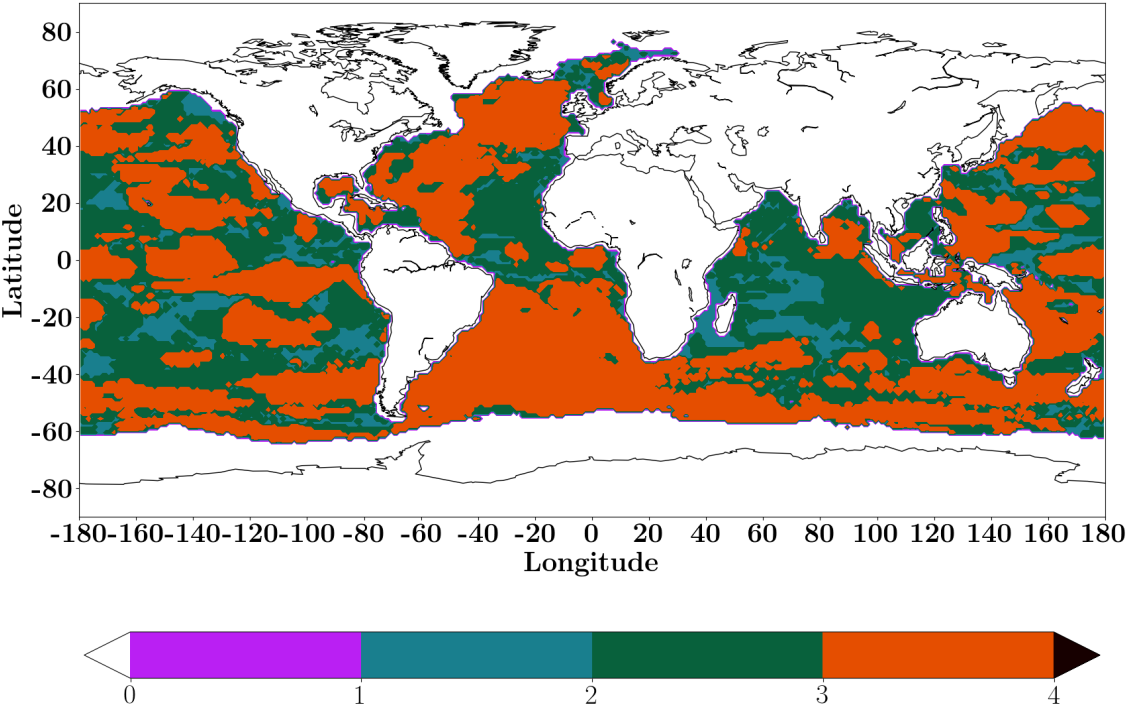

**Figure 9:** Agreement between four mapping methods in their linear trend of sea-air CO<sub>2</sub> flux. Color-bar represents the number of products that have the same sign of linear trend.

704  
705  
706  
707  
708  
709  
710  
711  
712  
713  
714  
715  
716  
717  
718  
719  
720  
721  
722  
723  
724Table 1: Statistical validation of FFNN-LSCE. Comparison between reconstructed surface ocean pCO<sub>2</sub> and  
725pCO<sub>2</sub> values from SOCAT v5 data base not used in the training algorithm for the period 2001-2016 over the  
726global ocean (except for regions with ice-cover) and for large oceanographic regions. In round brackets:



727 number of measurements per region

| Model                        | Latitude boundaries | RMS ( $\mu\text{atm}$ ) | $r^2$ | Bias ( $\mu\text{atm}$ ) |
|------------------------------|---------------------|-------------------------|-------|--------------------------|
| FFNN Global                  |                     | 17.97                   | 0.76  | 11.52                    |
| Arctic (150)                 | 76°N to 90°N        | 22.05                   | 0.54  | 17.1                     |
| Atlantic Subpolar (21903)    | 49°N to 76°N        | 22.99                   | 0.76  | 15.04                    |
| Pacific Subpolar (4529)      | 49°N to 76°N        | 34.77                   | 0.65  | 23.12                    |
| Atlantic Subtropical (41331) | 18°N to 49°N        | 17.28                   | 0.69  | 11.27                    |
| Pacific Subtropical (41867)  | 18°N to 49°N        | 15.86                   | 0.77  | 9.9                      |
| Atlantic Equatorial (7300)   | 18°S to 18°N        | 17.27                   | 0.57  | 11.44                    |
| Pacific Equatorial (27092)   | 18°S to 18°N        | 15.73                   | 0.79  | 10.33                    |
| South Atlantic (3002)        | 44°S to 18°S        | 17.81                   | 0.63  | 12.28                    |
| South Pacific (12934)        | 44°S to 18°S        | 13.52                   | 0.63  | 9.36                     |
| Indian Ocean (2871)          | 44°S to 30°N        | 17.25                   | 0.62  | 11.6                     |
| Southern Ocean (16334)       | 90°S to 44°S        | 17.4                    | 0.58  | 11.92                    |

728

729 Table 2: Biomes from Fay and McKinley (2014) used for time series comparison (Fig. 3)

| Number | Name                                              |
|--------|---------------------------------------------------|
| 1      | (Omitted) North Pacific Ice                       |
| 2      | North Pacific Subpolar Seasonally Stratified      |
| 3      | North Pacific Subtropical Seasonally Stratified   |
| 4      | North Pacific Subtropical Permanently Stratified  |
| 5      | West Pacific Equatorial                           |
| 6      | East Pacific Equatorial                           |
| 7      | South Pacific Subtropical Permanently Stratified  |
| 8      | (Omitted) North Atlantic Ice                      |
| 9      | North Atlantic Subpolar Seasonally Stratified     |
| 10     | North Atlantic Subtropical Seasonally Stratified  |
| 11     | North Atlantic Subtropical Permanently Stratified |
| 12     | Atlantic Equatorial                               |
| 13     | South Atlantic Subtropical Permanently Stratified |
| 14     | Indian Ocean Subtropical Permanently Stratified   |



|    |                                                  |
|----|--------------------------------------------------|
| 15 | Southern Ocean Subtropical Seasonally Stratified |
| 16 | Southern Ocean Subpolar Seasonally Stratified    |
| 17 | Southern Ocean Ice                               |

730

731 Table 3: Mean of sea-air CO<sub>2</sub> flux (PgC/yr) over the Global Ocean and per regions for period in common

732 (2001-2015). Averages over the period 2001-2009 are presented between brackets. The last column

733 presents a comparison to best estimates from Schuster et al. (2013) for the Atlantic Ocean (1990 – 2009).

| Region               | Latitude boundaries | FFNN-LSCE          | ETH-SOMFFN         | Jena-MLS13         | JMA-MLR            | Schuster et al. (2013), 1990-2009 |
|----------------------|---------------------|--------------------|--------------------|--------------------|--------------------|-----------------------------------|
| Global               |                     | -1.55<br>(-1.44)   | -1.67<br>(-1.47)   | -1.55<br>(-1.41)   | -1.74<br>(-1.62)   | ---                               |
| Arctic               | 76°N to 90°N        | -0.001             | -0.001             | -0.001             | -0.001             | -0.12±0.06                        |
| Atlantic Subpolar    | 49°N to 76°N        | -0.15<br>(-0.15)   | -0.14<br>(-0.12)   | -0.15<br>(-0.15)   | -0.16<br>(-0.15)   | -0.21±0.06                        |
| Pacific Subpolar     | 49°N to 76°N        | -0.003<br>(-0.005) | -0.009<br>(-0.004) | -0.006<br>(-0.004) | -0.027<br>(-0.021) | ---                               |
| Atlantic Subtropical | 18°N to 49°N        | -0.21<br>(-0.19)   | -0.21<br>(-0.19)   | -0.2<br>(-0.18)    | -0.21<br>(-0.2)    | -0.26±0.06                        |
| Pacific Subtropical  | 18°N to 49°N        | -0.45<br>(-0.46)   | -0.49<br>(-0.48)   | -0.47<br>(-0.46)   | -0.49<br>(-0.47)   | ---                               |
| Atlantic Equatorial  | 18°S to 18°N        | 0.085<br>(0.09)    | 0.085<br>(0.095)   | 0.08<br>(0.082)    | 0.1<br>(0.11)      | 0.12±0.04                         |
| Pacific Equatorial   | 18°S to 18°N        | 0.42<br>(0.41)     | 0.4<br>(0.4)       | 0.44<br>(0.42)     | 0.38<br>(0.37)     | ---                               |
| South Atlantic       | 44°S to 18°S        | -0.17<br>(-0.16)   | -0.18<br>(-0.16)   | -0.18<br>(-0.17)   | -0.23<br>(-0.22)   | -0.14±0.04                        |
| South Pacific        | 44°S to 18°S        | -0.33<br>(-0.34)   | -0.4<br>(-0.39)    | -0.35<br>(-0.34)   | -0.49<br>(-0.47)   | ---                               |
| Indian Ocean         | 44°S to 30°N        | -0.25<br>(-0.2)    | -0.32<br>(-0.29)   | -0.27<br>(-0.26)   | -0.27<br>(-0.29)   | ---                               |
| South Ocean          | 90°S to 44°S        | -0.38              | -0.29              | -0.36              | -0.26              | ---                               |

734

735

736

737

738

739

740
